1 The most abundant cyst wall proteins of *Acanthamoeba castellanii* are cellulose-binding lectins  
2 from three gene families that localize to distinct structures in cyst walls

3 Short title: Identification and characterization of *Acanthamoeba* cyst wall proteins

4 Pamela Magistrado-Coxen<sup>1,#a</sup>, Yousuf Aqeel<sup>1</sup>, Angelo Lopez<sup>1,2</sup>, John R. Haserick<sup>1,2,#b</sup>,  
5 Breeanna R. Urbanowicz<sup>3</sup>, Catherine E. Costello<sup>2</sup>, and John Samuelson<sup>1\*</sup>

6 <sup>1</sup> Department of Molecular and Cell Biology, Boston University Goldman School of Dental  
7 Medicine, Boston, Massachusetts, United States of America

8 <sup>2</sup> Department of Biochemistry, Boston University School of Medicine, Boston, Massachusetts,  
9 United States of America

10 <sup>3</sup> Complex Carbohydrate Research Center, University of Georgia, Athens, Georgia, United  
11 States of America

12 <sup>#a</sup> Current Address: Sarepta Therapeutics, Andover, Massachusetts, United States of America

13 <sup>#b</sup> Current Address: Glyde Bio, Inc., Cambridge, Massachusetts, United States of America

14 \* Corresponding author

15 E-mail: [jsamuels@bu.edu](mailto:jsamuels@bu.edu)

16

17

## 18 **Abstract**

19 *Acanthamoeba castellanii*, cause of keratitis and blindness, is an emerging pathogen  
20 because of its association with contact lens use. The cyst wall contributes to pathogenesis as  
21 cysts are resistant to sterilizing reagents in lens solutions and to antibiotics applied to the eye.  
22 Here we used structured illumination microscopy (SIM) and probes for glycopolymers to show  
23 that purified cyst walls of *A. castellanii* retain endocyst and ectocyst layers and conical  
24 structures (ostioles) that connect them. Mass spectrometry showed candidate cyst wall  
25 proteins (CWPs) are dominated by three families of lectins (named here Luke, Leo, and  
26 Jonah), because each binds to microcrystalline cellulose +/- chitin. Luke lectins contain two or  
27 three carbohydrate-binding modules (CBM49), which were first identified in a tomato cellulase.  
28 Leo lectins have two unique domains with eight Cys residues each (8-Cys) +/- a Thr-, Lys-,  
29 and His-rich spacer. Jonah lectins contain one or three choice-of-anchor A (CAA) domains  
30 previously of unknown function. Representative members of each family were tagged with  
31 green fluorescent protein (GFP) and expressed under their own promoters in transfected  
32 parasites. A representative Jonah lectin with one CAA domain is made early during  
33 encystation and localizes to the ectocyst layer. In contrast, Leo and Luke lectins are made later  
34 and localize to the endocyst layer and ostioles. Probes for CWPs (anti-GFP antibodies) and for  
35 glycopolymers (maltose-binding protein-fusions with CWPs) suggest Jonah lectin and the  
36 glycopolymers to which it binds are accessible in the ectocyst layer, while Luke and Leo lectins  
37 and their epitopes are mostly inaccessible in the ectocyst layer and ostioles. In summary, the  
38 most abundant *A. castellanii* CWPs are three sets of lectins, which have conserved (CBM49s  
39 of Luke), newly characterized (CAA of Jonah), or unique carbohydrate-binding modules (8-Cys  
40 of Jonah).

## 41 **Author summary**

42           Fifty years ago, the cyst wall of *Acanthamoeba castellanii* was shown to contain  
43 cellulose and have an ectocyst layer, an endocyst layer, and conical ostioles that attach them.  
44 The goals here were to identify abundant cyst wall proteins (CWPs) and begin to determine  
45 how the wall is assembled. We used wheat germ agglutinin to show cyst walls also contain  
46 chitin fibrils. When trophozoites are starved of nutrients, they become immotile and make  
47 CWPs and glycopolymers in dozens of small vesicles. The primordial cyst wall is composed of  
48 a single, thin layer containing cellulose, chitin, and an abundant CWP we called Jonah. The  
49 primordial wall also has small, flat ostioles that contain another abundant CWP we called Luke.  
50 Jonah (the best candidate for diagnostic antibodies) is accessible in the ectocyst layer of  
51 mature cyst walls, while Luke and a third abundant CWP we termed Leo are present but  
52 mostly inaccessible in the endocyst layer and ostioles. While *A. castellanii* cyst walls contain  
53 cellulose (like plants) and chitin (like fungi), the glycopolymers are made in vesicles rather than  
54 at the plasma membrane, and the CWPs (Luke, Leo, and Jonah lectins) are unique to the  
55 protist.

56

## 57 Introduction

58 *Acanthamoebae*, which include the genome project *A. castellanii* Neff strain studied  
59 here, are soil protists named for acanthopods (spikes) on the surface of trophozoites [1]. In  
60 immunocompetent persons, *Acanthamoebae* is a rare but important cause of corneal  
61 inflammation (keratitis), which is difficult to treat and so may lead to scarring and blindness [2-  
62 5]. In immunosuppressed patients, *Acanthamoebae* may cause granulomatous encephalitis  
63 [6]. *Acanthamoeba* is considered to be an emerging pathogen, because 80 to 90% of  
64 infections are associated with growing contact lens use and is often transmitted via dirty hands  
65 or contaminated lens solutions [7-9]. Water for hand washing is often scarce in places where  
66 *Acanthamoeba* is endemic. However, we recently showed that alcohols in concentrations  
67 present in hand sanitizers kill *A. castellanii* trophozoites and cysts, providing a possible route  
68 to reducing infection [10-12].

69 *Acanthamoebae* host numerous pathogenic bacteria and so may contribute to  
70 pneumonia (*Legionella pneumophila*), diarrhea (*Vibrio cholera* and *Campylobacter jejuni*), or  
71 disseminated disease (*Listeria monocytogenes*) [13-15]. *Acanthamoebae* also contain  
72 enormous double-stranded DNA viruses, which can cause respiratory infections [16, 17]. For  
73 30+ years, *Acanthamoeba* was used as a model system to identify and characterize the role of  
74 actin and actin-associated proteins in the cytoskeleton, during phagocytosis, and in cell motility  
75 [18, 19]. Finally, the *A. castellanii* genome contains >500 genes derived from bacteria by  
76 horizontal gene transfer (HGT), which is the greatest number of any human pathogen [1].

77 When *A. castellanii* trophozoites are deprived of nutrients in solution or on agar plates,  
78 they form cysts [20-22]. Transmission electron microscopy (TEM) shows cyst walls have two

79 fibril-dense layers (outer ectocyst and an inner endocyst), which are separated by a relatively  
80 fibril-free middle layer [23-25]. The endocyst and ectocyst layers are connected to each other  
81 by ostioles, which are conical and fibrillar. There is no cell division during encystation and  
82 excystation, so a single trophozoite passes through an individual ostiole when it exits the cyst  
83 [26]. The cyst wall of *A. castellanii* protects free-living parasites from osmotic shock when  
84 exposed to fresh water, from drying when exposed to air, or from starvation when deprived of  
85 bacteria or other food sources. Furthermore, the cyst wall also acts as a barrier, sheltering  
86 parasites from killing by disinfectants used to clean surfaces, sterilizing agents in contact lens  
87 solutions, or antibiotics applied directly to the eye [4, 5, 27-30].

88 We are interested in the cyst wall proteins (CWPs) of *A. castellanii* for four reasons. 1)  
89 Although monoclonal antibodies to *A. castellanii* have been made, the vast majority react to  
90 trophozoites, and no CWPs have been molecularly identified [31-35]. Indeed the only cyst-  
91 specific protein identified, which was named for its 21-kDa predicted size (CSP21), is unlikely  
92 to be a CWP, as it lacks a signal peptide [36, 37]. 2) *A. castellanii* and related species are the  
93 only human pathogens that contain cellulose in their wall [38-40]. Whole genome sequences  
94 predict that there is a set of proteins with tandemly repeated carbohydrate-binding modules  
95 (CBM49) that was previously shown to be a cellulose-binding domain at the C-terminus of the  
96 tomato cellulase S1Cel9C1 [41-43]. It is possible then that the *A. castellanii* CBM49 domain  
97 proteins are lectins that bind cellulose fibrils in the cyst wall [44]. 3) The whole genome of *A.*  
98 *castellanii* predicts a chitin synthase, a chitinase, and two chitin deacetylases, suggesting the  
99 possibility that chitin and chitin-binding proteins are present in the cyst wall [1, 45-49]. 4) We  
100 wanted to test the idea that structured illumination microscopy (SIM), which samples the entire  
101 wall of dozens of cysts without need for sectioning, may be able to replace, at least partially,

102 immunoelectron microscopy, which samples 100-nm sections of just a few cysts, for  
103 localization of proteins in the ectocyst and endocyst layers and ostioles [50].

104         The experimental design here was simple. We used SIM and probes for glycopolymers  
105 to localize structures in developing and mature cyst walls of *A. castellanii*. Specifically, we  
106 focused on probes for chitin and cellulose, which are a  $\beta$ -1,4-linked homopolymers of N-  
107 acetylglucosamine and D-glucose, respectively, that exist as hydrogen-bonded chains called  
108 microfibrils. SIM and TEM were used to check the intactness of purified cyst walls, which were  
109 treated with trypsin to identify candidate CWPs by mass spectrometry. We chose  
110 representative proteins from each of three families of abundant candidate CWPs and checked  
111 the timing of their expression, determined their localization and accessibility in the cyst wall (or  
112 not), and determined whether each protein binds cellulose and/or chitin. In this way, we began  
113 to answer five basic questions concerning *A. castellanii* CWPs: What are their identities?  
114 When are they made? Where are CWPs located in the developing and mature cyst wall? Why  
115 are CWPs located there? Which CWP is the best target for production of diagnostic  
116 antibodies?

## 117 **Results**

118         **SIM of encysting *Acanthamoebae* shows glycopolymers are made in secretory**  
119 **vesicles and the primordial cyst wall is a single, thin layer with small, flat ostioles.** To  
120 visualize the structures of developing and mature cyst walls of *A. castellanii* by SIM, we used  
121 probes that bind chitin (wheat germ agglutinin, WGA) and  $\beta$ -1,3 and  $\beta$ -1,4 polysaccharides  
122 (calcofluor white, CFW) in the walls of *Saccharomyces* and *Entamoeba* cysts [51-54]. CFW, a  
123 fluorescent brightener, has also been used to diagnose *A. castellanii* cysts in eye infections

124 [55]. We also made a glutathione-S-transferase (GST) fusion-protein, which contains the N-  
125 terminal CBM49 of a candidate CWP of *A. castellanii* (S1 Fig and S1 Excel file) [56]. The GST-  
126 AcCBM49 expression construct was designed to replicate that used to determine the  
127 carbohydrate binding properties of SICBM49, which is a C-terminal CBM of the *Solanum*  
128 *lycopersicum* (tomato) cellulase SIGH9C [41].

129 GST-AcCBM49, WGA, and CFW bind to a small number of organisms in trophozoite  
130 cultures that are spontaneously encysting. In contrast, all three probes label dozens of vesicles  
131 of organisms induced to encyst by placing them on non-nutrient agar plates for three to six hr  
132 (Fig 1A). After 12 hr encystation, WGA-labeled vesicles are still prominent, but those labeled  
133 with GST-AcCBM49 are fewer and smaller (Fig 1B). GST-AcCBM49, WGA, and CFW each  
134 labels primordial cyst walls, which have a single, thin layer that is closely apposed to the  
135 surface of the encysting cell. The primordial wall contains small, flat ostioles, which label with  
136 CFW but not with GST-AcCBM49 or WGA. After 36 hr encystation, GST-AcCBM49  
137 predominantly labels the ectocyst layer, while WGA predominantly labels the endocyst layer  
138 that is closely apposed to the cell inside (Fig 1C). WGA labels dome-shaped ostioles in a  
139 punctate manner, while CFW diffusely binds the endocyst layer and ostioles. After 72 hr  
140 encystation, mature cyst walls are labeled in a similar manner, except that WGA labels an  
141 epitope that forms a sharp ring around ostioles (Fig 1D).

142 **Conclusions.** These results show glycopolymers labeled with WGA and GST-  
143 AcCBM49 are made in secretory vesicles of encysting *A. castellanii*. The primordial cyst wall is  
144 single-layered and has the beginnings of ostioles (stained by CFW), which are small and flat  
145 but are present in the same number and are distributed in a similar fashion to that of mature

146 ostioles. The ectocyst layer of mature cyst walls is primarily labeled by GST-AcCBM49, while  
147 the endocyst layer and conical ostioles primarily label with WGA and stain with CFW.

148 **SIM and TEM show purified *A. castellanii* cyst walls preserve distinct endocyst**  
149 **and ectocyst layers, as well as ostioles.** We used SIM and TEM to check the integrity and  
150 cleanliness of cyst wall preparations, which were made by sonicating cysts and separating  
151 walls from cellular contents by density centrifugation and retention on a membrane with 8  
152 micron pores. SIM shows that in purified cyst walls, like in intact cyst walls, GST-AcCBM49  
153 predominantly labels the ectocyst layer, WGA highlights the ostioles, and CFW stains the  
154 endocyst layer (Fig 1E).

155 For TEM, intact cysts and purified cyst walls were frozen under high pressure, and  
156 fixatives were infiltrated at low temperature [57]. Walls of intact cysts and purified cyst walls  
157 each have an ectocyst layer and an endocyst layer, as well as conical ostioles that link the two  
158 layers (Fig 2A) [23-25]. At higher magnification, bundles of fibrils are apparent in the endocyst  
159 layer, which is thicker (~300 nm) and less electron-dense than the ectocyst layer (~100 nm)  
160 (Fig 2C). The space between the endocyst and ectocyst layers, which is often wider in purified  
161 walls, is electron-lucent with a few thin fibrils. The purified walls are missing amorphous  
162 material that fills the space between the inner aspect of the cyst wall and the plasma  
163 membrane of the single trophozoite inside (Figs 2B and 2D). At the edge of the ostiole, the  
164 endocyst layer splits into an external face that meets the ectocyst layer (Fig 2E). In the center  
165 of the ostiole, the ectocyst layer forms a narrow cap over the internal face of the endocyst  
166 layer, which splits again.



167           **Conclusions.** SIM and TEM both show that ectocyst and endocyst layers, as well as  
168 ostioles, are preserved in purified cyst walls, which are relatively free of cellular material. The  
169 purified walls were then used to identify candidate CWPs by mass spectrometry.

170           **Mass spectrometry shows candidate CWPs of *A. castellanii* are encoded by**  
171 **multigene families and contain tandem repeats of short domains (CBM49, 8-Cys, and**  
172 **CAA).** Trypsin treatment of purified *A. castellanii* cyst walls followed by liquid chromatography  
173 mass spectrometry (LC-MS/MS) analysis of the released peptides gave similar results across  
174 five biological experiments (Table 1 and S1 Excel file). While some proteins remain in cyst  
175 walls after trypsin digestion, their identities are similar to those detected in the soluble fractions  
176 by in gel-digests with trypsin or chymotrypsin. Candidate CWPs with the most unique peptides  
177 identified by LC-MS/MS belong to three families, which we named Luke, Leo, and Jonah  
178 lectins, because each binds cellulose +/- chitin (see below). Although it is impossible to draw a  
179 line that separates actual CWPs from contaminating proteins, secreted proteins with 18+  
180 unique peptides include six Leo lectins, four Luke lectins, and three Jonah lectins. The vast  
181 majority of proteins with <18 unique peptides are predicted to be cytosolic (including the 21-  
182 kDa cyst-specific protein (CSP21) localized below) and so are likely intracellular contaminants  
183 of cyst wall preparations. The exception to this hypothesis, we think, are additional Luke, Leo,  
184 and Jonah lectins, which are most likely less abundant CWPs. For readers interested in  
185 cytosolic proteins of *A. castellanii*, we have added S2 Excel file, which contains all the mass  
186 spectrometry data including a “dirty” cyst wall preparation that was generated without using a  
187 Percoll gradient or porous filter.

188

**Table 1. Candidate CWP identified by mass spectrometry**

|                             | <b>ID</b>   | <b># Unique peptides</b> | <b>Coverage (%)</b> | <b>Mass (kDa)</b> |
|-----------------------------|-------------|--------------------------|---------------------|-------------------|
| <b>Jonah</b>                |             |                          |                     |                   |
| three CAAs                  | ACA1_157320 | 147                      | 38                  | 146               |
| one CAA                     | ACA1_164810 | 83                       | 56                  | 58                |
|                             | ACA1_261530 | 18                       | 23                  | 55                |
|                             | ACA1_133400 | 9                        | 24                  | 44                |
|                             | ACA1_377440 | 6                        | 11                  | 47                |
| <b>Luke</b>                 |             |                          |                     |                   |
| three CBM49s                | ACA1_245650 | 72                       | 74                  | 44                |
|                             | ACA1_160160 | 8                        | 25                  | 43                |
|                             | ACA1_187760 | 7                        | 25                  | 42                |
|                             | ACA1_252830 | 6                        | 19                  | 44                |
|                             | ACA1_031530 | 6                        | 21                  | 43                |
|                             | ACA1_253650 | 5                        | 20                  | 42                |
|                             | ACA1_253500 | 5                        | 19                  | 42                |
|                             | ACA1_061050 | 3                        | 12                  | 43                |
|                             | ACA1_287530 | 2                        | 14                  | 43                |
| two CBM49s                  | ACA1_377670 | 78                       | 68                  | 29                |
|                             | ACA1_096300 | 47                       | 77                  | 28                |
|                             | ACA1_246110 | 22                       | 70                  | 27                |
| <b>Leo</b>                  |             |                          |                     |                   |
| two 8-Cys domains           | ACA1_074730 | 34                       | 82                  | 20                |
|                             | ACA1_351320 | 24                       | 44                  | 20                |
|                             | ACA1_394030 | 24                       | 44                  | 20                |
|                             | ACA1_394280 | 24                       | 36                  | 24                |
|                             | ACA1_083920 | 19                       | 68                  | 20                |
|                             | ACA1_394560 | 1                        | 10                  | 19                |
| two 8-Cys + TKH-rich spacer | ACA1_188350 | 21                       | 20                  | 59                |
|                             | ACA1_374130 | 7                        | 20                  | 52                |
|                             | ACA1_188550 | 7                        | 15                  | 46                |
|                             | ACA1_188370 | 6                        | 9                   | 68                |
|                             | ACA1_116240 | 5                        | 18                  | 56                |
|                             | ACA1_365840 | 3                        | 18                  | 44                |
|                             | ACA1_117050 | 3                        | 33                  | 36                |
|                             | ACA1_096640 | 2                        | 27                  | 37                |

190

191 Luke lectins are comprised of an N-terminal signal peptide, followed by two (Luke(2)) or  
192 three CBM49s (Luke(3)) separated by Ser- and Pro-rich spacers (Fig 3 and S2 Fig) [37, 42,  
193 43, 58]. The N-terminal CBM49 of Luke lectins contains three conserved Trp residues  
194 conserved in SI CBM49 from tomato [41]. A fourth conserved Trp is present in the CBM49 of  
195 *D. discoideum* cellulose-binding proteins [43]. The other CBM49s (middle and/or C-terminal) of  
196 Luke lectins have two conserved Trp residues. Luke lectins are acidic (pI 5 to 6) and have  
197 formula weights (FWs) from 27 to 29-kDa (Luke(2)) or 42 to 44-kDa (Luke(3)). There are no  
198 predicted transmembrane helices or GPI-anchors in the Luke or Leo lectins [59, 60]. LC-  
199 MS/MS of the released cell wall peptides identified at least one unique peptide corresponding  
200 to all 12 genes encoding Luke lectins, although the number of unique peptides varied from 78  
201 to two (Table 1 and S1 Excel file). In general, Luke lectins with two CBM49s have more unique  
202 peptides than Luke lectins with three CBM49s. One to four unique peptides were derived from  
203 three CBM49-metalloprotease fusion-proteins, which consist of an N-terminal signal peptide  
204 followed by a single CBM49 with four conserved Trp residues and a metalloprotease  
205 (ADAM/reprolysin subtype) with a conserved catalytic domain (HEIGHNLGGNH) [58]. We  
206 used the same Luke(2) lectin (ACA1\_377670) to perform RT-PCR, make rabbit anti-peptide  
207 antibodies, and make maltose-binding protein (MBP)- and green fluorescent protein (GFP)-  
208 fusions (S1 Fig) [18, 56, 61-63]. In addition, we used Luke(3) lectin (ACA1\_245650) to make  
209 a GFP-fusion (S2 Fig).

210 Leo lectins have an N-terminal signal peptide followed by two repeats of a unique 8-Cys  
211 domain, some of which are separated by a long Thr-, Lys-, and His-rich spacer (Fig 3 and S2

212 Fig). Leo lectins without a spacer are acidic (pI ~4.8) and have FWs from 19 to 24-kDa, while  
213 Leo lectins with the TKH-rich spacer (Leo(TKH)) are basic (pI ~8.3) and have FWs from 36- to  
214 59-kDa. Leo lectins are encoded by 16 genes, of which 14 proteins were identified by our LC-  
215 MS/MS analysis. While the number of unique peptides varies from 34 to one, Leo lectins  
216 without the spacer generally have more unique peptides than Leo(TKH)s. We used a Leo  
217 lectin with no spacer (ACA1\_074730) to perform RT-PCR, make rabbit anti-peptide antibodies,  
218 and make MBP- and GFP-fusions (S1 Fig).

219         Jonah lectins have an N-terminal signal peptide followed by one or three choice-of-  
220 anchor A (CAA) domains (Fig 3 and S2 Fig) [58]. The binding activity of the CAA domain,  
221 which is adjacent to a collagen-binding domain in a microbial surface component recognizing  
222 the adhesive matrix molecule (MSRAMM) of *Bacillus anthracis*, is not known [64]. Jonah(1)  
223 lectins with a single CAA domain are acidic (pI ~6), have a FW from 44 to 58-kDa and have an  
224 N-terminal Thr-, Lys-, and Cys-rich domain. Jonah(3) lectins with three CAA domains are basic  
225 (pI ~8.8), have a FW of ~146-kDa, and contain Ser- and Pro-rich spacers between CAA  
226 domains, as well as and hydrophobic regions that may be transmembrane helices [60]. Jonah  
227 lectins are encoded by eight genes, of which five can be identified by our LC-MS/MS analysis  
228 based on one to 147 unique peptides. We used a Jonah(1) lectin (ACA1\_164810) with a single  
229 CAA domain to perform RT-PCR, make rabbit anti-peptide antibodies, and make MBP- and  
230 GFP-fusions (S1 Fig).

231         Other secreted proteins with 18+ unique peptides detected by LC-MS/MS, which are  
232 candidate CWPs, include a laccase with three copper oxidase domains (ACA1\_068450), a  
233 protein with a C-terminal ferritin-like domain (ACA1\_292810), a Kazal-type serine protease

234 inhibitor (ACA1\_291590), a conserved uncharacterized protein (ACA1\_068630), and a protein  
235 unique to *A. castellanii* (ACA1\_145900) [58, 65-67].

236 **Conclusions.** These results suggest that the most abundant candidate CWPs of *A.*  
237 *castellanii* contain tandem repeats of conserved domains (CBM49 in Luke lectins and CAA in  
238 Jonah lectins) or a unique domain (8-Cys in Leo lectins). Peptides corresponding to nearly all  
239 members of each gene family were detected by mass spectrometry, although the relative  
240 abundances of unique peptides for each CWP vary by more than an order of magnitude,  
241 suggesting marked differences in gene expression. Because we did not (and cannot) separate  
242 cyst walls into component parts (endocyst and ectocyst layers and ostioles) prior to LC-MS/MS  
243 analysis of tryptic peptides, we used SIM and GFP-tags to localize one or two representative  
244 members of each family of CWPs in cyst walls of transfected *A. castellanii* (see below).

245 **Origins and diversity of genes that encode Luke, Leo, and Jonah lectins.** Leo  
246 lectins, which have two domains with 8-Cys each, appear to be unique to *A. castellanii*, as no  
247 homologs were identified when BLAST analysis was performed using the nonredundant (NR)  
248 database at NCBI (<https://www.ncbi.nlm.nih.gov/>). The origin of genes encoding Luke lectins is  
249 difficult to infer, because its CBM49s show only a 31% identity over a short (77-amino acid)  
250 overlap with a predicted cellulose-binding protein of *D. discoideum* (expect value of BLASTP is  
251 just 7e-05) [45]. In contrast, the CAA domain of Jonah lectins appears to derive from bacteria  
252 by horizontal gene transfer (HGT), as no other eukaryote contains CAA domains, and there is  
253 a 28% identity over a bigger (263-aa) overlap with a choice-of anchor A family protein of  
254 *Saccharibacillus sp. O16* (5e-12). The *A. castellanii* laccase (also known as copper oxidase),  
255 whose signals were abundant in the mass spectra, is likely the product of HGT, as there is a  
256 44% identity over a large (526-aa) overlap with a copper oxidase of *Caldicobacteri oshimai*

257 (6e-135). The uncertainty is based upon the presence of similar enzymes in plants, one of  
258 which (*Ziziphus jujube*) shows a 39% identity over a 484-aa overlap (4e-101) with the *A.*  
259 *castellanii* laccase.

260 No pairs of genes within each lectin family are syntenic, suggesting that individual  
261 genes rather than clusters of genes were duplicated. With the exception of two Luke lectins  
262 (ACA1\_253500 and ACA1\_253650) that are 98% identical and two Leo lectins (ACA1\_074770  
263 and ACA1\_083920) that are 85% identical, members of each family of CWPs differ in amino  
264 acid sequence by >40%. Genes that encode CWPs also vary in the number of introns (zero to  
265 two in Luke, two to four in Leo, and zero to 24 in Jonah). Searches of genomic sequences of  
266 11 strains of *Acanthamoebae*, deposited in AmoebaDB without protein predictions by Andrew  
267 Jackson of the University of Liverpool, using TBLASTN and sequences of representative Luke,  
268 Leo, and Jonah lectins localized in the next section showed four results [47]. First, although  
269 stop codons are difficult to identify using this method, all 11 strains appear to encode each  
270 CWP. Second, most strains show 100 to 200-amino acid stretches of each CWP that are 80 to  
271 90% identical to the *A. castellanii* Neff strain studied here. These stretches exclude low  
272 complexity spacers that are difficult to align. Third, some of the strains show greater  
273 differences from the Neff strain in each CWP, consistent with previous descriptions of  
274 *Acanthamoeba* strain diversity based upon 18S rDNA sequences [68]. Fourth, while coding  
275 sequences and 5' UTRs are well conserved, introns are very poorly conserved, with the  
276 exception of branch-point sequences.

277 **Conclusions.** Genes encoding Jonah lectin and laccase likely derive by HGT, while  
278 genes encoding Leo lectins appear to originate within *Acanthamoeba*. Although CBM49s of  
279 Luke lectins share common ancestry with plants and other Amoebazoa, their precise origin is

280 not clear. For the most part, gene duplications that expanded each family within the  
281 *Acanthamoeba* genome occurred a long time ago, as shown by big differences in amino acid  
282 sequences of paralogous proteins and variations in the number of introns. However, the set of  
283 Luke, Leo, and Jonah lectins identified by mass spectrometry and the sequence of  
284 representative CWPs localized in the next section both appear to be conserved among 11  
285 sequenced isolates. This result suggests antibodies to a particular CWP in the *A. castellanii*  
286 Neff strain would likely recognize the same protein in other strains of *Acanthamoebae*.

287 **SIM shows a representative Jonah lectin is made early and is present in the**  
288 **ectocyst layer of mature cyst walls, while representative Luke and Leo lectins are made**  
289 **later and are present in the endocyst layer and ostioles.** To localize candidate CWPs, we  
290 expressed representative Luke(2), Leo, and Jonah(1) lectins each with a GFP-tag under its  
291 own promoter (446-, 486- and 571-bp of the 5'UTR, respectively) in transfected trophozoites of  
292 *A. castellanii*, using an episomal vector that was selected with G418 (S1 Fig and S3 Excel file)  
293 [62, 63]. GFP-tagged candidate CWPs expressed under their own promoter are absent in the  
294 vast majority of log-phase trophozoites, which divide but do not become cysts (data not  
295 shown). GFP-tagged CWPs are present in small numbers in trophozoites in stationary  
296 cultures, where some organisms have begun to encyst spontaneously. In contrast, the vast  
297 majority of mature cysts express GFP-tagged CWPs in their walls, although the strength of the  
298 signal varies among the lectins assayed (S3 Fig).

299 After three to six hr encystation, Jonah(1)-GFP (single CAA domain) is present in  
300 hundreds of small vesicles, which are distinct from the WGA-labeled vesicles (Fig 4A). At 15  
301 hr, Jonah(1)-GFP is present in a fibrillar pattern in the single layer of the primordial cyst wall  
302 (Fig 4B). CFW-labeled ostioles are not visible with Jonah(1)-GFP or WGA. At 24 hr, Jonah(1)-

303 GFP is present in the ectocyst layer, which is its final destination in the mature cyst wall (Figs  
304 4C and 4D). At this time, the endocyst layer labeled by WGA and CFW has separated from the  
305 ectocyst layer.

306 Luke(2)-GFP (two CBM49s) and Leo-GFP (two 8-Cys domains) are both made later  
307 than Jonah-GFP. Indeed vesicles containing these two lectins are too small and too few in  
308 number to be visualized easily with SIM even after 12 hr encystation. At 15 hr, Luke(2)-GFP  
309 forms a sharp outline around the edges of a subset of ostioles, which are small and flat (Fig  
310 5A). At 18 and 24 hr, Luke(2)-GFP expands across the endocyst layer and ostioles, which has  
311 begun to separate from the ectocyst layer (Figs 5B and 5C). In mature cysts, Luke(2)-GFP  
312 forms dense rings around the ostioles (Fig 5D). The distribution of Leo-GFP is different from  
313 that of Luke(2)-GFP in a number of ways. At 15 hr, Leo-GFP is present in abundant small  
314 vesicles, some of which have reached the single-layered wall (Fig 6A). At 18 hr, Leo-GFP  
315 forms patches on the cyst wall, which are for the most part independent of ostioles (Fig 6B).  
316 Only at 36 hr does Leo-GFP accumulate at the edges of the ostioles, which is its location in  
317 mature cysts (Figs 6C and 6D). We counted an average of 8.8 +/- 2.5 ostioles per cyst wall by  
318 rotating SIM images of cysts expressing Luke-GFP and Leo-GFP or labeled with WGA, MBP-  
319 Luke, or MBP-Leo (24 cysts total).

320 **Conclusions.** These results show that ~500 bp of the 5' UTR is sufficient to cause  
321 encystation-specific expression of GFP-tagged representatives of Luke, Leo, and Jonah  
322 lectins. Jonah(1)-GFP is made early and is present in the single-layered, primordial cyst wall  
323 and the ectocyst layer of mature cyst walls. Luke(2)-GFP, which is made later, is present in  
324 some of the small, flat ostioles in the primordial cyst wall and in the endocyst layer and conical  
325 ostioles of mature cyst walls. Leo-GFP, which is also made later, is absent from small, flat



326 ostioles, but is present in endocyst layer and ostioles of mature cyst walls. This is the first  
327 estimate of the number of ostioles in *Acanthamoeba* cyst walls, because ostioles have not  
328 previously been visualized by light microscopy and are impossible to count by TEM, as the  
329 100-nm thick sections poorly sample the ostioles (Fig 2).

330 **Control experiments suggest that the timing and locations of GFP-tagged**  
331 **constructs in mature cyst walls are accurate.** RT-PCR showed that mRNAs of  
332 representative Luke, Leo, and Jonah lectins, as well as cellulose synthase (ACA1\_349650),  
333 are absent or nearly absent from trophozoites but are present during the first three days of  
334 encystation (S4 Fig). These results are consistent with encystation-specific expression of GFP-  
335 tagged CWPs under their own promoter (Figs 4-6). In contrast, glyceraldehyde 3-phosphate  
336 dehydrogenase (GAPDH), which catalyzes the sixth step in glycolysis, is expressed in both  
337 trophozoites and encysting *A. castellanii* [62]. Monospecific, polyclonal rabbit antibodies to a  
338 50-amino acid peptide of a representative Jonah lectin and a 16-amino acid peptide of a  
339 representative Leo lectin bind to Western blots of proteins from cysts but not trophozoites (S5  
340 Fig). (Rabbit antibodies to a 50-amino acid peptide of Luke(2) lectin did not react to  
341 trophozoites or cysts). Although these rabbit anti-peptide antibodies do not work for localization  
342 of CWPs by SIM, they confirm the encystation-specific expression of the GFP-tagged proteins  
343 under their own promoter.

344 An abundant Luke lectin with three CBM49s tagged with GFP (Luke(3)-GFP)  
345 (ACA1\_245650) and expressed under its own promoter is present in the endocyst layer and  
346 ostioles of mature cyst walls, which is the same place where Luke(2)-GFP with two CBM49s is  
347 located (Figs 3 and 5 and S2 Fig). In contrast, GFP-tagged cyst-specific protein CSP21  
348 expressed under its own promoter is present in cytosolic accumulations of mature cysts (Fig 6)

349 [36, 69]. Under a constitutive GAPDH promoter, Luke(2)-GFP and Jonah(1)-GFP are both  
350 present in secretory vesicles of trophozoites, which do not change their “acanthamoeboid”  
351 appearance when observed by differential-inference contrast microscopy (S6 Fig) (Leo-GFP  
352 did not express well under the GAPDH promoter). In addition, when Jonah(1)-GFP was  
353 expressed using the GAPDH promoter, it localizes to the ectocyst layer of mature cyst walls,  
354 while Luke(2)-GFP localizes to both the endocyst layer and ostioles (Figs 4 and 5). These are  
355 the same locations where Jonah(1)-GFP and Luke(2)-GFP go when expressed under their  
356 own promoter. In contrast, when GFP is expressed alone under control of the GAPDH  
357 promoter, it remains localized in the cytosol of trophozoites and cysts (S6 Fig). A GFP-fusion  
358 protein appended with an N-terminal signal peptide from Luke(2) lectin, also expressed under  
359 a GAPDH promoter, localizes to secretory vesicles of trophozoites and cysts but not to cyst  
360 walls (Fig 6). Finally, while there are issues of accessibility, MBP-Jonah(1), MBP-Luke(2), and  
361 MBP-Leo bind to the same structures in the mature cyst wall, where GFP-tagged CWPs  
362 localize when expressed under their own promoter (see next section).

363 **Conclusions.** RT-PCR and Western blots with anti-CWP antibodies confirm the  
364 encystation-specific expression of GFP-tagged CWPs under their own promoters. The number  
365 of CBM49s does not appear to affect localization of Luke lectins, as Luke(2)-GFP and Luke(3)-  
366 GFP each localize to endocyst layer and ostioles. Because localizations of Luke(2)-GFP and  
367 Jonah(1)-GFP are the same under their own or GAPDH promoters, it appears that intrinsic  
368 properties of each CWP (e.g. carbohydrate-binding specificity tested below) rather than timing  
369 of expression determine its location in the cyst wall. As CSP21 is homologous to universal  
370 stress proteins and lacks an N-terminal signal peptide, its presence in the cytosol after nutrient  
371 deprivation was expected [69, 70].

372           **Jonah lectin and glycopolymers are readily accessible in ectocyst layer of mature**  
373 **cyst walls, while Luke and Leo lectins and glycopolymers are poorly accessible in the**  
374 **endocyst layer and ostioles.** To determine the accessibility of glycopolymers in the two  
375 layers of the cyst wall and ostioles, we fused each CWP to MBP and recombinantly expressed  
376 them in the periplasm of *E. coli*. Previously, we have used MBP-fusions to express a chitin-  
377 binding domain of an *Entamoeba* Jessie lectin, a  $\beta$ -1,3-linked GalNAc polymer-binding domain  
378 of *Giardia* cyst wall protein 1, and a  $\beta$ -1,3-glucan-binding domain of a *Toxoplasma* glucanase  
379 [71-73]. MBP-Jonah(1) labels small vesicles and the primordial cyst wall of encysting  
380 organisms (Fig 7). MBP-Jonah(1) also binds to the ectocyst layer of mature cell walls, which is  
381 the same location as Jonah(1)-GFP expressed under its own promoter (Fig 4). Because nearly  
382 100% of the organisms are labeled with MBP-Jonah(1), glycopolymer(s) bound by Jonah  
383 lectins must not be completely covered by CWPs (S7 Fig). MBP-Luke(2) and MBP-Leo also  
384 label small vesicles and the primordial cyst wall of encysting organisms, but these probes label  
385 the endocyst layer and ostioles of <10% mature cyst walls (Fig 7 and S7 Fig). Although these  
386 are the same places where Luke(2)-GFP and Leo-GFP localize under their own promoter (Figs  
387 5 and 6), these results suggest that glycopolymers bound by Luke and Leo lectins in the  
388 endocyst layer and ostioles are, for the most part, inaccessible to external probes. In a parallel  
389 fashion, anti-GFP antibodies show that Jonah(2)-GFP is accessible in the endocyst layer of  
390 nearly 100% of mature cysts with a detectable Jonah-GFP signal (Fig 4 and S3 Fig). In  
391 contrast, anti-GFP antibodies show Luke(2)-GFP and Leo-GFP are accessible in the endocyst  
392 layer and ostioles of 3 and 2%, respectively, of cysts with detectable GFP signals.

393           **Conclusions.** Jonah(1)-GFP and glycopolymer(s) bound by MBP-Jonah(1) are  
394 accessible in the ectocyst layer of mature cyst walls, while Luke(2)-GFP and Leo-GFP and

395 glycopolymers bound by MBP-Luke(2) and MBP-Leo are, for the most part, inaccessible in the  
396 endocyst layer and ostioles. It appears the CWPs and glycopolymers in the ectocyst layer  
397 block access of external probes to the endocyst layer and ostioles. Alternatively, CWPs and  
398 glycopolymers in the endocyst layer and ostioles are so tightly packed that they are  
399 inaccessible to external probes.

400 **Luke, Leo, and Jonah lectins all bind microcrystalline cellulose, while binding of**  
401 **CWPs to chitin beads is variable.** To test the binding of representative CWPs to  
402 commercially available glycopolymers, we isolated GFP alone and GFP-labeled Luke and  
403 Jonah lectins from lysed trophozoites that expressed each fusion-protein under the GAPDH  
404 promoter (S1 and S6 Figs). We also performed parallel experiments using MBP-CWP fusion-  
405 proteins recombinantly expressed in *E. coli*. The targets were microcrystalline cellulose (used  
406 to characterize binding activities of GST-SICBM49 from tomato cellulase) and chitin beads  
407 (used to characterize myc-tagged Jacob and Jessie lectins of *E. histolytica*) [41, 74].

408 Western blots anti-GFP and anti-MBP antibodies show both Luke(2)-GFP and MBP-  
409 Luke(2), each of which is partially degraded, bind to microcrystalline cellulose and somewhat  
410 less well to chitin beads (Fig 8). Jonah(1)-GFP and MBP-Jonah(1) also bind to microcrystalline  
411 cellulose, while binding to chitin beads is mixed (Jonah(1)-GFP not at all and MBP-Jonah(1) to  
412 some degree). MBP-Leo binds less well to microcrystalline cellulose and weakly at best to  
413 chitin beads. GFP alone and MBP alone (negative controls) do not bind to microcrystalline  
414 cellulose or chitin beads.

415 **Conclusions.** Luke(2) and Jonah(1) lectins bind cellulose well, while Leo lectin binds  
416 cellulose less well. Luke(2) lectin also binds well to chitin beads, while binding of Leo and  
417 Jonah(1) lectins is much less to chitin beads.

## 418 Discussion

419           **Numerous advantages of studying *A. castellanii* cyst walls.** *A. castellanii* has a  
420 number of properties that make it possible to quickly identify and begin to characterize its  
421 CWPs. The protist grows axenically in medium without serum or vitamins and synchronously  
422 encysts when placed on non-nutrient agar plates [20, 21]. Cyst walls separate cleanly from  
423 cellular contents without losing essential structures (ectocyst and endocyst layers and  
424 ostioles), which we show can be readily visualized with SIM using probes for wall  
425 glycopolymers (GST-AcCBM49, WGA, and CFW). The most abundant CWPs belong to three  
426 protein families that contain tandem repeats of CBM49s (Luke lectins), 8-Cys domains (Leo  
427 lectins), or CAA domains (Jonah lectins). Although CRISPR/Cas9 methods are not yet  
428 available, stable expression of GFP-tagged proteins under their own promoters allows  
429 localization of candidate CWPs during cyst wall development using SIM [62, 63]. Expression of  
430 GFP-tagged proteins under a constitutive promoter in trophozoites or expression of  
431 recombinant proteins in the periplasm (MBP-fusions) of bacteria makes it possible to assay the  
432 ability of CWPs to bind microcrystalline cellulose or chitin beads by techniques that have been  
433 previously used to characterize other protist cyst wall lectins and carbohydrate-binding  
434 modules [41, 61, 74].

435           The ease of studying cyst walls of *A. castellanii* is in contrast to studies of cyst walls of  
436 *E. histolytica*, which do not encyst *in vitro* and so are modeled by cysts of the reptilian  
437 pathogen *E. invadens* [53, 71]. While *Giardia* cysts made in mice excyst well, cysts made *in*  
438 *vitro* do not [72]. *Toxoplasma* forms walled oocysts in cats, while *Cryptosporidium* forms  
439 oocysts in cows, mice, or gnotobiotic pigs [73, 75, 76]. Oomycetes (water molds that cause  
440 potato blight) also have cellulose and chitin in their walls, but the amount of chitin is very small,

441 and  $\beta$ -1,3-glucan is also present [77]. The spore coat of *Dictyostelium discoideum*, a cousin of  
442 *A. castellanii*, contains cellulose and a heteropolysaccharide of galactose and GalNAc, but it  
443 lacks chitin [78, 79].

444 **Familiarity and novelty in *A. castellanii* CWPs.** While *Giardia* has three copies of a  
445 unique cyst wall protein with Leu-rich repeats (CWP1 to CWP3) and *Entamoeba* has two  
446 copies each of unique Cys-rich, cyst wall proteins (Jacob and Jessie lectins), *A. castellanii* has  
447 many copies each of its three CWPs [71, 72, 80]. although we expected Luke lectins with two  
448 or three CBM49s would be present in the cellulose-rich cyst wall, we could not have predicted  
449 the other abundant CWPs, because the 8-Cys domains of Leo lectins are unique to  
450 *Acanthamoebae* and the CAA domain(s) of Jonah lectins were previously uncharacterized [41,  
451 64].

452 While Luke lectins have two or three CBM49s, *D. discoideum* has dozens of proteins  
453 with a single CBM49 (S8 Fig) [42, 43, 81]. In addition, there is a rare uncharacterized protein  
454 with three CBM49s. The Luke(2) lectin binds cellulose and chitin, while the *D. discoideum*  
455 proteins with a single CBM49 bind cellulose. Chitin-binding was not tested DdCBM49 or  
456 SICBM49 because this polysaccharide is not present in *D. discoideum* and tomato walls.  
457 Demonstration that CBM49s of the Luke(2) lectin likely also bind chitin fibrils is new, but is  
458 consistent with recent studies showing CBMs may bind more than one glycopolymer [82]. The  
459 metalloprotease fused to an N-terminal CBM49 of *A. castellanii* is absent in *D. discoideum*,  
460 while *D. discoideum* adds two CBM49s to a cysteine proteinase, which lacks these domains in  
461 *A. castellanii* [58]. The CBM49 may act to localize the metalloproteases to the *A. castellanii*  
462 cyst wall, as is the case for the chitin-binding domain in *Entamoeba* chitinases or glucan-  
463 binding domain in *Toxoplasma* glucanases [71, 73, 74]. Alternatively, the CBM49 may suggest

464 the metalloprotease is specific for glycopeptides rather than peptides. While the GH5 glycoside  
465 hydrolases of *A. castellanii* lack CBM49 domains, CBM49 is present at the C-terminus of GH9  
466 glycoside hydrolases of *D. discoideum* and *S. lycopersicum* (tomato) [41].

467 Even though *A. castellanii* Leo lectins and *E. histolytica* Jacob lectins share no common  
468 ancestry, they have 8-Cys and 6-Cys lectin domains, respectively, often separated by low  
469 complexity sequences (S9 Fig) [74, 80]. *E. histolytica* low complexity sequences vary from  
470 strain to strain, contain cryptic sites for cysteine proteases, and are extensively decorated with  
471 O-phosphate-linked glycans [83]. We have not yet identified any Asn-linked or O-linked  
472 glycans on Leo lectins or any of the other CWPs. *A. castellanii* and oomycetes (*Pyromyces*  
473 and *Neocallimistic*) each contain proteins with arrays of CAA domains, but the sequences of  
474 the CAAs are so different that it is likely that concatenation of domains occurred independently  
475 (S10 Fig) [43, 58]. Although *A. castellanii* is exposed to collagen in the extracellular matrix of  
476 the cornea, the protist lacks a homolog of the collagen-binding domain that is adjacent to the  
477 CAA domain in the *Bacillus anthracis* collagen-binding protein [64].

478 Concatenation of carbohydrate-binding domains in Luke, Leo, and Jonah lectins, which  
479 has previously been shown in WGA, Jacob lectins of *E. histolytica*, and peritrophins of insects,  
480 most likely increases the avidity of the lectins for glycopolymers [53, 74, 80, 83, 84]. The large  
481 number of genes encoding Luke, Leo, and Jonah lectins may be necessary to increase the  
482 numbers of CWPs coating glycopolymers in the cyst wall. We showed that Luke(2)-GFP and  
483 Luke(3)-GFP localize to the same place in mature cyst walls. We did not test Leo(TKC) lectins  
484 with a long spacer or Jonah(3) lectins with three tandem repeats of CAA domains. Finally,  
485 other candidate CWPs, which are abundant but present at lower copy numbers (e.g. laccase  
486 or ferritin-domain protein), may have important functions in the cyst wall [65-67].

487           **Insights into the structure and assembly of the *A. castellanii* cyst wall.** Assembly  
488 of the cyst wall, which is comprised of two layers that are connected by ostioles, is a  
489 complicated process. Chitin (detected with WGA) and cellulose (detected with MBP-Luke,  
490 MBP-Leo, and/or MBP-Jonah) are both made in vesicles. Similarly, chitin is made in vesicles  
491 of encysting *Entamoeba*, and a  $\beta$ -1,3-linked GalNAc polymer is made in vesicles of encysting  
492 *Giardia* [71, 72]. In contrast, fungi make chitin and  $\beta$ -1,3-glucan at the plasma membrane, and  
493 cellulose synthesis in plants takes place at the plasma membrane [85, 86]. Because Luke,  
494 Leo, and Jonah lectins bind cellulose but also bind chitin to varying degrees, definitive  
495 localization of cellulose and chitin in vesicles of encysting organisms will depend upon  
496 localization of cellulose and chitin synthases, each of which is encoded by a single gene *A.*  
497 *castellanii* [45, 47, 58].

498           Small, flat ostioles in the single-layered primordial cyst wall label beautifully with CFW,  
499 but not with probes for chitin and cellulose, so the identity of the glycopolymer in early ostioles  
500 remains unknown. CFW has been shown to bind several  $\beta$ -1,3 and  $\beta$ -1,4 polysaccharides,  
501 including cellulose, chitin, mixed linkage glucans and galactoglucomannan [85]. Therefore, our  
502 data suggests that *A. castellanii* may be producing a previously uncharacterized CFW-binding  
503 polysaccharide in the ostioles. Alternatively, the fibrillar form of the polysaccharide in the  
504 ostioles is not recognized by the cellulose- or chitin-binding probes. Because GFP-tagged  
505 CWPs expressed under the GAPDH promoter are absent from the surface of trophozoites and  
506 ostioles label with CFW prior to being coated with Luke(2)-GFP under its own promoter, it  
507 appears that CWPs are binding to glycopolymers rather than vice versa. What is directing  
508 glycopolymers to form ostioles and later endocyst and ectocyst layers (e.g. Rho GTPases that



509 direct chitin synthases in bud necks and septa of *Saccharomyces*) is of great interest but was  
510 not determined [86, 87].

511 Because timing of expression does not affect localization of the CWPs tested here,  
512 intrinsic properties of each lectin appear to determine its localization. Binding studies with  
513 microcrystalline cellulose and chitin beads show CWPs bind best to cellulose but also bind  
514 chitin to varying degrees. These binding studies with commercial substrates do not explain  
515 why Jonah binds to glycopolymers in the ectocyst layer, while Luke and Jonah lectins bind to  
516 glycopolymers in the endocyst layer and ostioles. It is likely that each lectin recognizes specific  
517 fibrillar forms of cellulose and/or chitin, which remain uncharacterized. There may also be  
518 protein-protein interactions and/or lectin-glycoprotein interactions. As an example of protein-  
519 protein interactions, an *E. histolytica* Jessie lectin has a chitin-binding domain and a self-  
520 agglutinating “daub” domain, which makes cyst walls impermeable to probes as small as  
521 phalloidin (789-Da) [71]. As an example of lectin-glycan interactions, the Gal/GalNAc lectin on  
522 the plasma membrane of *E. histolytica* binds to glycans on Jacob lectins, and these in turn  
523 bind to chitin fibrils in the cyst wall [53].

524 Cellulose and chitin are likely present in both layers of the cyst wall and in ostioles,  
525 based upon the following evidence. While the chitin-binding lectin WGA strongly labels the  
526 endocyst layer and ostioles of mature cyst walls, WGA often labels the ectocyst layer, as well.  
527 Cellulose-binding CWPs are abundant in the ectocyst (Jonah(1)-GFP) and endocyst layer and  
528 the ostioles (Luke(2)-GFP and Leo-GFP). Jonah(1)-GFP and glycopolymers bound by MBP-  
529 Jonah(1) are both accessible in the ectocyst layer. In contrast, Luke(2)-GFP and Leo-GFP and  
530 glycopolymers bound by MBP-Luke(2) and MBP-Leo are, for the most part, inaccessible in the  
531 endocyst layer and the ostioles. These results suggest the ectocyst layer may be accessible to

532 bacterial glycoside hydrolases and proteases, while the endocyst layer and ostioles are not.  
533 Glycoproteins in the walls of *Giardia*, *Eimeria*, and *Saccharomyces* protect glycopolymers from  
534 exogenous or endogenous glycoside hydrolases [71-73, 86]. How *A. castellanii* glycoside  
535 hydrolases, which belong to CAZy families ([www.cazy.org](http://www.cazy.org)) GH1, GH5, GH8, GH10, and  
536 GH18, are involved in wall formation during encystation and enzyme-catalyzed destruction  
537 and/or reorganization of the wall during excystation is of great interest but beyond the scope of  
538 these studies [42, 43, 45, 47].

539 **Implications for diagnostics and therapeutics.** While the focus here was on the  
540 biochemistry and cell biology of the cyst wall, an abundant and accessible Jonah(1) lectin in  
541 the ectocyst layer appears to be an excellent target for diagnostic antibodies for *A. castellanii*  
542 cysts [31, 32, 34]. We expect each antibody would react with a single Jonah lectin, as  
543 paralogous CWPs, with a couple of exceptions, share less than 40% amino acid identities.  
544 *Giardia* CWP1 and *Entamoeba* Jacob2 lectin, which are abundant and accessible in cyst walls,  
545 are targets for diagnostic antibodies [88, 89]. In contrast, Luke(2) and Leo lectins are not  
546 accessible in the endocyst layer and ostioles, and so these abundant CWPs do not appear to  
547 be good targets for diagnostic antibodies. Evidence for chitin in the cyst wall, admittedly not  
548 extensively developed here, suggests the possibility that chitin synthase inhibitors might be  
549 used as therapeutics [90]. Preliminary studies have explored the possibility of cellulose  
550 synthase inhibitors as therapeutics versus *A. castellanii* cysts [91-94]. The SIM methods, which  
551 worked so well here to study *A. castellanii* cyst walls, might be used to study the fine structure  
552 and assembly of other protist walls. Finally, insights from studies of the development of the *A.*  
553 *castellanii* cyst wall, which is relatively simple, may inform studies of fungal and plant walls,  
554 which are highly complex.

555 **Materials and methods.**

556 **Ethics Statement.** Culture and manipulation of *A. castellanii* have been approved by  
557 the Boston University Institutional Biosafety Committee.

558 **Culture of trophozoites and preparation of encysting organisms and cysts.** *A.*  
559 *castellanii* Neff strain trophozoites were purchased from the American Type Culture collection.  
560 Trophozoites of *A. castellanii* MEEI 0184 strain, which was derived from a human corneal  
561 infection, were obtained from Dr. Noorjahan Panjwani of Tufts University School of Medicine  
562 [12]. Trophozoites were grown in T-75 tissue culture flasks at 30°C in 10 ml ATCC medium  
563 712 (PYG plus additives), which contains 2% proteose peptone, 0.1% yeast extract, 0.1 M  
564 glucose, 4 mM MgSO<sub>4</sub>, 0.4 mM CaCl<sub>2</sub>, 3.4 mM sodium citrate, 0.05 mM Fe(NH<sub>4</sub>)<sub>2</sub>(SO<sub>4</sub>)<sub>2</sub>, 2.5  
565 mM Na<sub>2</sub>HPO<sub>4</sub>, and 2.5 mM KH<sub>2</sub>PO<sub>4</sub>, pH 6.5 (Sigma-Aldrich Corporation, St. Louis, MO) [21].  
566 Flasks containing log-phase trophozoites (free of cysts that form spontaneously in stationary  
567 cultures) were either chilled or scraped with a cell scraper to release adherent amoebae, which  
568 were concentrated by centrifugation at 500 x g for 5 min and washed twice with phosphate  
569 buffered saline (PBS). Approximately 10<sup>7</sup> amoebae obtained from a confluent flask were  
570 induced to encyst by incubation at 30°C on non-nutrient agar plates [20]. After 6, 12, 15, 18,  
571 24, 36, or 72 hr incubation, 15 ml of PBS were added to agar plates, which were incubated on  
572 a shaker for 30 min at room temperature (RT). Encysting organisms were removed using a cell  
573 scraper and concentrated by centrifugation at 1,500 x g for 10 min.

574 **Preparation of mature cyst walls for SIM, TEM, and mass spectrometry.** After 3 to  
575 10 days incubation on non-agar plates, mature cysts were washed in PBS and suspended in  
576 lysis buffer (10 mM HEPES, 25 mM KCl, 1 mM CaCl<sub>2</sub>, 10 mM MgCl<sub>2</sub>, 2% CHAPS, and 1X

577 Roche protease inhibitor) (Sigma-Aldrich). For SIM, cysts in 500- $\mu$ l lysis buffer were broken  
578 four times for 2 min each with 200  $\mu$ l of 0.5 mm glass beads in a Mini-Beadbeater-16 (BioSpec  
579 Products, Bartlesville, OK). For TEM, where glass beads cannot be used, cysts in 200- $\mu$ l lysis  
580 buffer were broken by sonication four times for 20 seconds each in continuous mode in a  
581 Sonicator Cell Disruptor (formerly Heat Systems Ultrasonic, now Qsonica, Newtown, CT).  
582 Broken cysts were added to the top a 15-ml falcon tube containing 60% sucrose and  
583 centrifuged at 4,000 x g for 10 min. The broken cyst wall pellet was suspended in PBS buffer  
584 and washed three times at 10,000 x g in a microcentrifuge. The cyst wall pellet was used  
585 directly for labeling for SIM or fixation for TEM. For mass spectrometry, the cyst wall pellet  
586 broken in the bead beater was overlaid on gradient containing 2 ml each of 20%, 40%, 60%  
587 and 80% Percoll (top to bottom) and centrifuged for 20 min at 3,000 x g. The layer between  
588 60% and 80% Percoll, where the broken cyst walls were located, was collected and washed in  
589 PBS. The cyst wall preparation was suspended in 10 ml of PBS, placed in a syringe, and  
590 forced through a 25-mm diameter Whatman Nuclepore Track-Etched Membrane with 8- $\mu$ m  
591 holes (Sigma-Aldrich). The cellular debris, which passed through the membranes, was  
592 discarded. The membrane was removed from the cassette, suspended in 5 ml of PBS, and  
593 vortexed to release cyst walls. The membrane was removed, and cyst walls were distributed in  
594 microfuge tubes and pelleted at 15,000 x g for 10 min. The pellet was suspended in 50  $\mu$ l PBS  
595 and stored at -20°C prior to trypsin digestion and mass spectrometry analysis.

596 **SIM of glycopolymers of encysting organisms, mature cysts, and purified cyst**  
597 **walls.** A GST-AcCBM49 fusion-construct, which contains the N-terminal CBM49 of a  
598 representative Luke lectin minus the signal peptide, was prepared by codon optimization (76 to  
599 330-bp coding region of ACA1\_377670) (GenScript, Piscataway, NJ). It was cloned into pGEX-

600 6p-1 (GE Healthcare Life Sciences, Marlborough, MA) for cytoplasmic expression in  
601 BL21(DE3) chemically competent *E. coli* (Thermo Fisher Scientific, Waltham, MA) [41, 56].  
602 Expression of GST-AcCBM49 and GST were induced with 1 mM IPTG for 4 hr at RT, and  
603 GST-fusions were purified on glutathione-agarose and conjugated to Alexa Fluor 594  
604 succinimidyl esters (red) (Molecular Probes, Thermo Fisher Scientific). Approximately  $10^6$   
605 trophozoites, encysting organisms, mature cysts, or cyst walls were washed in PBS and fixed  
606 in 1% paraformaldehyde buffered with phosphate for 15 min at RT. Pellets were washed two  
607 times with Hank's Buffered Saline Solution (HBSS) and incubated with HBSS containing 1%  
608 bovine serum albumin (BSA) for 1 hour at RT. Preparations were then incubated for 2 hr at  
609  $4^{\circ}\text{C}$  with 2.5  $\mu\text{g}$  GST or GST-CBM49 conjugated to Alexa Fluor 594 and 12.5  $\mu\text{g}$  of WGA  
610 (Vector Laboratories, Burlingame, CA) conjugated to Alexa Fluor 488 in 100  $\mu\text{l}$  HBSS [52, 53].  
611 Finally, pellets were labeled with 100  $\mu\text{g}$  of calcofluor white M2R (Sigma-Aldrich) in 100  $\mu\text{l}$   
612 HBSS for 15 min at RT and washed five times with HBSS [51, 55]. Preparations were mounted  
613 in Mowiol mounting medium (Sigma-Aldrich) and observed with widefield and differential  
614 interference contrast microscopy, using a 100x objective of a Zeiss AXIO inverted microscope  
615 with a Colibri LED (Carl Zeiss Microcopy LLC, Thornwood, NY). Images were collected at 0.2-  
616  $\mu\text{m}$  optical sections with a Hamamatsu Orca-R2 camera and deconvolved using ZEN software  
617 (Zeiss). Alternatively, SIM was performed with a 63-x objective of a Zeiss ELYRA S.1  
618 microscope at Boston College (Chestnut Hill, MA), and 0.09- $\mu\text{m}$  optical sections deconvolved  
619 using Zen software [50]. To count ostioles, we rotated 3D reconstructions of each cyst wall  
620 labeled with WGA, MBP-Luke, MBP-Leo, Luke-GFP, or Leo-GFP (24 cysts total), which were  
621 prepared as described below.

622           **TEM of intact and purified walls.** High-pressure freezing and freeze substitution were  
623 used to prepare cyst and cyst walls for TEM at the Harvard Medical School Electron  
624 Microscope facility [57]. To make them noninfectious, we fixed mature cysts in 1%  
625 paraformaldehyde for 10 min at RT and washed them 2 times in PBS. Cyst walls in PBS were  
626 pelleted, placed in 6-mm Cu/Au carriers, and frozen in an EM ICE high-pressure freezer (Leica  
627 Microsystems, Buffalo Grove, IL). Freeze substitution was performed in a Leica EM AFS2  
628 instrument in dry acetone containing 1%  $d_4H_2O$ , 1%  $OsO_4$ , and 1% glutaraldehyde at  $-90^\circ C$  for  
629 48 hr. The temperature was increased  $5^\circ C/hour$  to  $20^\circ C$ , and samples were washed 3 times in  
630 pure acetone and once in propylene oxide for 10 min each. Samples were infiltrated with 1:1  
631 Epon:propylene oxide overnight at  $4^\circ C$  and embedded in TAAB Epon (Marivac Canada Inc. St.  
632 Laurent, Canada). Ultrathin sections (80 to 100 nm thick) were cut on a Leica Reichert Ultracut  
633 S microtome, picked up onto copper grids, stained with lead citrate, and examined in a JEOL  
634 1200EX transmission electron microscope (JEOL USA, Peabody, MA). Images were recorded  
635 with an AMT 2k CCD camera.

636           **Mass spectrometry of tryptic and chymotryptic peptides from cyst walls.** Broken  
637 cyst walls, prepared as above, were dissolved into 50 mM  $NH_4HCO_3$ , pH 8.0, reduced with 50  
638 mM dithiothreitol (DTT) for 20 min at  $60^\circ C$ , alkylated with iodoacetamide (IAA) for 20 min at  
639 RT, and then digested with proteomics grade trypsin (Sigma-Aldrich) overnight at  $37^\circ C$ .  
640 Alternatively broken cyst walls either before or after digestion with trypsin were reconstituted in  
641  $1\times$  reducing SDS/PAGE loading buffer and run on a 4–20% precast polyacrylamide TGX gel  
642 (Bio-Rad). Bands stained by colloidal Coomassie blue were excised and washed with 50 mM  
643  $NH_4HCO_3$ /acetonitrile (ACN). Reduction, alkylation, and trypsin/chymotrypsin digestion were  
644 performed in-gel. Peptides were dried and desalted using C18 ZipTip concentrators (EMD

645 Millipore). Peptides from five biological replicates for both *in solution* and *in-situ* hydrolysis  
646 were dissolved in 2% ACN, 0.1% formic acid (FA) and separated using a nanoAcquity-UPLC  
647 system (Waters) equipped with a 5- $\mu$ m Symmetry C18 trap column (180  $\mu$ m x 20 mm) and a  
648 1.7- $\mu$ m BEH130 C18 analytical column (150  $\mu$ m x 100 mm). Samples were loaded onto the  
649 precolumn and washed for 4 min at a flow rate of 4  $\mu$ l/min with 100% mobile phase A (99%  
650 Water/1% ACN/0.1% FA). Samples were eluted to the analytical column with a gradient of 2–  
651 40% mobile phase B (99% ACN/1% Water/0.1% FA) delivered over 40 or 90 min at a flow rate  
652 of 0.5  $\mu$ l/min. The analytical column was connected online to a QE or a QE-HF Mass  
653 Spectrometer (Thermo Fisher Scientific) equipped with a Triversa NanoMate (Advion Inc.,  
654 Ithaca, NY) electrospray ionization (ESI) source, which was operated at 1.7 kV. Data were  
655 acquired in automatic Data Dependent top 10 (QE) or top 20 (QE-HF) mode. Automated  
656 database searches were performed using the PEAKS software suite version 8.5  
657 (Bioinformatics Solutions Inc., Waterloo, ON, Canada). The search criteria were set as follows:  
658 trypsin/chymotrypsin as the enzyme with  $\leq 3$  missed cleavages and  $\leq 1$  non-specific cleavage,  
659 the error tolerances for the precursor of 5 ppm and 0.05 Da for fragment ions,  
660 carbamidomethyl cysteine as a fixed modification, oxidation of methionine, Pyro-glu from  
661 glutamine, and deamidation of asparagine or glutamine as variable modifications. The peptide  
662 match threshold ( $-10 \log P$ ) was set to 15, and only proteins with a minimum of two unique  
663 peptides were considered. The mass spectrometry proteomics data have been deposited to  
664 the ProteomeXchange Consortium (<http://proteomecentral.proteomexchange.org>) via the  
665 PRIDE partner repository with the dataset identifiers PXD011826 and 10.6019/PXD011826  
666 [95].

667           **Bioinformatic characterization of candidate CWPs.** Signal peptides and  
668 transmembrane helices were predicted using SignalP 4.1 and TMHMM, respectively [37, 60].  
669 GPI anchors were searched for using big-PI [59]. AmoebaDB, which contains sequence  
670 information from the Neff strain, was used to identify genome sequences, predict introns, and  
671 identify paralogous proteins by BLASTP [45, 47]. TBLASTN were used to identify homologous  
672 proteins in 11 sequenced genomes, which have been assembled without protein predictions.  
673 BLASTP against the NR database at the NCBI was used to identify homologs of candidate  
674 CWPs in other species and conserved domains [58]. Carbohydrate-binding modules were  
675 searched using CAZy and InterPro databases [42, 43].

676           **Expression and visualization of GFP-fusions in transfected *A. castellanii*.** We used  
677 RT-PCR from RNA of encysting protists to obtain the coding sequences of a representative  
678 Luke lectin (840-bp CDS of ACA1\_377670) (Luke(2), Leo lectin (562-bp CDS of  
679 ACA1\_074730), and Jonah lectin (1596-bp CDS of ACA1\_164810) (Jonah(1)). Using  
680 NEBuilder HiFi DNA assembly (New England Biolabs, Ipswich, MA), we cloned each CDS into  
681 the pGAPDH plasmid, which was a kind gift from Yeonchul Hong [62, 63]. pGAPDH contains a  
682 neomycin resistance gene under a TATA-box promoter (for selection with G418) and a  
683 glyceraldehyde 3-phosphate dehydrogenase promoter for constitutive expression of GFP-  
684 fusions (S1 Fig and S3 Excel file). The GFP tag was placed at the C-terminus of each CWP,  
685 and a polyadenylation sequence was added downstream of the GFP-fusion's stop codon. As  
686 controls, GFP alone and GFP with a 60-bp sequence encoding the signal peptide of Luke(2)  
687 lectin were cloned into the same pGAPDH vector. For expression of CWP genes under their  
688 own promoters, we replaced the GAPDH promoter with 446-bp from the 5' UTR of the Luke(2)  
689 gene, 486-bp from the 5' UTR of the Leo gene, and 571-bp of the 5' UTR of the Jonah(1) gene,



690 each cloned from the genomic DNA. A second Luke lectin representative (500-bp 5' UTR and  
691 1293-bp CDS of ACA1\_245650; Luke(3)) was tagged with GFP. The 470-bp 5' UTR and 525-  
692 bp CDS of cyst-specific protein 21 (CSP21) (ACA1\_075240) were also tagged with GFP [36,  
693 69].

694 Transfections in *A. castellanii* were performed as described previously [62] with some  
695 modifications. Briefly,  $5 \times 10^5$  log-phase trophozoites were allowed to adhere to 6-well plates in  
696 ATCC medium 712 for 30 min at 30°C. The adherent trophozoites were washed and replaced  
697 with 500  $\mu$ l of non-nutrient medium (20 mM Tris-HCl [pH 8.8], 100 mM KCl, 8 mM MgSO<sub>4</sub>, 0.4  
698 mM CaCl<sub>2</sub> and 1 mM NaHCO<sub>3</sub>). In an Eppendorf tube, 4  $\mu$ g of Midiprep (PureLink HiPure  
699 Midiprep Kit, Thermo Fisher Scientific) plasmid DNA was diluted to 100  $\mu$ l with non-nutrient  
700 medium. Twenty microliters of SuperFect Transfection Reagent (Qiagen Inc, Germantown,  
701 MD) was added to the DNA suspension, mixed gently by pipetting five times, and incubated for  
702 10 min at RT. Six hundred microliters of non-nutrient medium was added to the DNA-  
703 SuperFect mix, and the entire suspension added to the trophozoites adhering to the 6-well  
704 culture plate. The culture plate was incubated for 3 hr at 30°C, after which the non-nutrient  
705 medium was replaced with ATCC medium 712 and incubated for another 24 hr at 30°C. To  
706 select for transfectants, we added 12.5  $\mu$ g/ml of Gibco G418 antibiotic (Thermo Fisher  
707 Scientific) to the culture after 24 hr, and we changed the medium plus antibiotic every 4 days.  
708 After 2 to 4 weeks, the transfectants were growing robustly in the presence of the antibiotic,  
709 and trophozoites and/or cysts expressing GFP were detected by widefield microscopy. These  
710 organisms were induced to encyst, fixed, labeled with WGA and CFW, and examined by  
711 widefield microscopy and SIM, as described above.

712           **Labeling of encysting parasites and mature cysts with CWPs fused to MBP.** MBP-  
713 fusion constructs were prepared (S3 Excel file) by cloning the cDNA of a representative  
714 Luke(2) lectin (60 to 843-bp CDS of ACA1\_377670) and a representative Jonah(1) lectin (70 to  
715 1599-bp CDS of ACA1\_164810) without their signal sequences into pMAL-p2x vector (New  
716 England Biolabs) for periplasmic expression in BL21-CodonPlus(DE3)-RIPL (Agilent  
717 Technologies, Lexington, MA) [61]. For the Leo-MBP fusion, the Leo CDS without the signal  
718 sequence (67 to 564-bp of ACA1\_074730) was codon optimized (GenScript) and cloned into  
719 pMAL-p2x vector. MBP-Luke(2) was induced with 250  $\mu$ M IPTG for 5 hr at RT; MBP-Jonah(1)  
720 was induced with 1 mM IPTG for 5 hr at RT; and MBP-Leo was induced with 250  $\mu$ M IPTG for  
721 3.5 hr at 37°C. MBP-fusion proteins were purified with amylose resin following the  
722 manufacturer's instructions (GE Healthcare, Pierce, Agilent Technologies and New England  
723 Biolabs). Encysting organisms and mature cysts were fixed, blocked, and incubated with 15  $\mu$ g  
724 of each MBP-CWP fusion conjugated to Alex Fluor 594 in for 2 hr at 4°C. Preparations were  
725 labeled with WGA conjugated to Alexa Fluor 488 and CFW, as described above.

726           **Labeling of mature cysts expressing GFP-fusions with anti-GFP antibodies.**  
727 Mature cysts expressing GFP-fusions under their own promoter were blocked with BSA,  
728 incubated with 1:400 mouse anti-GFP IgG (Roche) for 1 hr at RT, washed and then incubated  
729 with 1:800 goat anti-mouse IgG-Alexa Fluor 594 (Molecular Probes, Invitrogen). Preparations  
730 were labeled with CFW and fixed in paraformaldehyde as the last step prior to mounting.

731           **Binding of GFP- and MBP-fusions to microcrystalline cellulose and chitin beads.**  
732 Approximately  $2 \times 10^6$  trophozoites expressing GFP-tagged CWPs or GFP alone under a  
733 GAPDH promoter were lysed in 100  $\mu$ l of 1% NP40. Mass spectrometry of GFP-fusions  
734 purified on GFP-Trap\_A (ChromoTek GmbH, Planegg-Martinsried, Germany) showed that

735 each preparation was strongly enriched with GFP-fusions but also contained actin and actin-  
736 binding proteins. GFP-fusions from  $2 \times 10^6$  lysed trophozoites or MBP-fusions (1  $\mu$ g each in  
737 100  $\mu$ l of 1% NP40 ) were incubated with 0.5  $\mu$ g Avicel microcrystalline cellulose (Sigma-  
738 Aldrich) or a 50- $\mu$ l slurry of magnetic chitin beads (New England Biolabs) for 3 hr at 4<sup>o</sup>C with  
739 rocking. Cellulose or chitin beads were centrifuged to collect the supernatant (unbound  
740 fraction) and pellet (bound fraction). The pellet was washed three times with 1% NP40. To  
741 solubilize proteins, the input material (total), unbound, and bound fractions were boiled in SDS  
742 sample buffer. Proteins were visualized in SDS-PAGE gels and Western blots using anti-GFP  
743 (Roche) or anti-MBP (New England Biolabs) antibodies.

744 **Western blots of *A. castellanii* trophozoite and cyst lysates probed with anti-lectin**  
745 **rabbit antibodies.** Log-phase trophozoites and 36-hr-old cysts were harvested, and the total  
746 protein solubilized in SDS sample buffer, run in SDS-PAGE gels, blotted on PVDF  
747 membranes, and blocked in 5% BSA. MBP-CWP fusions and MBP alone were run in adjacent  
748 lanes as positive and negative controls, respectively. The blots were probed with 1:100  
749 dilutions of rabbit polyclonal antibodies (Li International) raised to 16- or 50-amino acid  
750 peptides of representative Luke (residues 230-279 of ACA1\_377670), Leo (residues 124-139  
751 of ACA1\_074730) and Jonah (residues 362-411 of ACA1\_164810). A 1:1000 dilution of anti-  
752 rabbit IgG-HRP (BioRad) was used as secondary antibody and Super Signal West Pico PLUS  
753 (ThermoFisher Scientific) for chemiluminescent detection. Coomassie stained gels were run in  
754 parallel for loading control.

## 755 **References.**

- 756 1. Clarke M, Lohan AJ, Liu B, Lagkouvardos I, Roy S, Zafar N, et al. Genome of  
757 *Acanthamoeba castellanii* highlights extensive lateral gene transfer and early evolution

- 758 of tyrosine kinase signaling. *Genome Biol* 2013;14(2):R11. doi: 10.1186/gb-2013-14-2-  
759 r11.
- 760 2. Clarke B, Sinha A, Parmar DN, Sykakis E. Advances in the diagnosis and treatment of  
761 *Acanthamoeba* keratitis. *J Ophthalmol* 2012;484892 doi: 10.1155/2012/484892.
- 762 3. Lorenzo-Morales J, Khan NA, Walochnik J. An update on *Acanthamoeba* keratitis:  
763 diagnosis, pathogenesis and treatment. *Parasite* 2015;22:10 doi:  
764 10.1051/parasite/2015010.
- 765 4. Carrijo-Carvalho LC, Sant'ana VP, Foronda AS, de Freitas D, de Souza Carvalho FR.  
766 Therapeutic agents and biocides for ocular infections by free-living amoebae of  
767 *Acanthamoeba* genus. *Surv Ophthalmol* 2017;62(2):203-218 doi:  
768 10.1016/j.survophthal.2016.10.00.
- 769 5. Carnt N, Robaei D, Minassian DC, Dart JKG. *Acanthamoeba* keratitis in 194 patients:  
770 risk factors for bad outcomes and severe inflammatory complications. *Br J Ophthalmol*.  
771 2018;102(10):1431-35 doi: 10.1136/bjophthalmol-2017-310806.
- 772 6. Satlin MJ, Graham JK, Visvesvara GS, Mena H, Marks KM, Saal SD, et al. Fulminant  
773 and fatal encephalitis caused by *Acanthamoeba* in a kidney transplant recipient: case  
774 report and literature review. *Transpl Infect Dis* 2013;15(6):619-26 doi:  
775 10.1111/tid.12131.
- 776 7. Lorenzo-Morales J, Martín-Navarro CM, López-Arencibia A, Arnalich-Montiel F, Piñero  
777 JE, Valladares B. *Acanthamoeba* keratitis: an emerging disease gathering importance  
778 worldwide? *Trends Parasitol* 2013;29(4):181-7 doi: 10.1016/j.pt.2013.01.006.
- 779 8. Cope JR, Collier SA, Rao MM, Chalmers R, Mitchell GL, Richdale K, et al. Contact lens  
780 wearer demographics and risk behaviors for contact lens-related eye infections--United

- 781 States, 2014. MMWR Morb Mortal Wkly Rep 2015;64(32):865-70 DOI:  
782 10.15585/mmwr.mm6432a2.
- 783 9. Carnt N, Hoffman JJ, Verma S, Hau S, Radford CF, Minassian DC, et al.  
784 *Acanthamoeba* keratitis: confirmation of the UK outbreak and a prospective case-control  
785 study identifying contributing risk factors. Br J Ophthalmol 2018;312544. doi:  
786 10.1136/bjophthalmol-2018-312544.
- 787 10. Pittet D, Allegranzi B, Boyce J. The World Health Organization Guidelines on Hand  
788 Hygiene in Health Care and their consensus recommendations. Infect Control Hosp  
789 Epidemiol 2009;30(7):611-22 doi: 10.1086/600379.
- 790 11. Mekonnen MM, Hoekstra AY. Four billion people facing water scarcity. Sci Adv  
791 2016;2(2):e1500323 doi: 10.1126/sciadv.1500323.
- 792 12. Aqeel Y, Rodriguez R, Chatterjee A, Ingalls RR, Samuelson J. Killing of diverse eye  
793 pathogens (*Acanthamoeba castellanii*, *Fusarium solani*, and *Chlamydia trachomatis*)  
794 with alcohols. PLoS Negl Trop Dis 2017;11(2):e0005382 doi:  
795 10.1371/journal.pntd.0005382.
- 796 13. Tosetti N, Croxatto A, Greub G. Amoebae as a tool to isolate new bacterial species, to  
797 discover new virulence factors and to study the host-pathogen interactions. Microb  
798 Pathog 2014;77:125-30 doi: 10.1016/j.micpath.2014.07.009.
- 799 14. Van der Henst C, Scrinari T, Maclachlan C, Blokesch M. An intracellular replication  
800 niche for *Vibrio cholerae* in the amoeba *Acanthamoeba castellanii*. ISME J  
801 2016;10(4):897-910 doi: 10.1038/ismej.2015.165.
- 802 15. Vieira A, Seddon, Karlyshev AV. *Campylobacter-Acanthamoeba* interactions.  
803 Microbiology 2015;161(Pt 5):933-47 doi: 10.1099/mic.0.000075.

- 804 16. La Scola B. Looking at protists as a source of pathogenic viruses. *Microb Pathog*  
805 2014;77:131-5 doi: 10.1016/j.micpath.2014.09.005.
- 806 17. Abergel C, Legendre M, Claverie JM. The rapidly expanding universe of giant viruses:  
807 Mimivirus, Pandoravirus, Pithovirus and Mollivirus. *FEMS Microbiol Rev*  
808 2015;39(6):779-96 doi: 10.1093/femsre/fuv037.
- 809 18. Kong HH, Pollard TD. Intracellular localization and dynamics of myosin-II and myosin-IC  
810 in live *Acanthamoeba* by transient transfection of EGFP fusion proteins. *J Cell Sci*  
811 2002;115(Pt 24):4993-5002 doi: 10.1242/jcs.00159.
- 812 19. Ostap EM, Maupin P, Doberstein SK, Baines IC, Korn ED, Pollard TD. Dynamic  
813 localization of myosin-I to endocytic structures in *Acanthamoeba*. *Cell Motil*  
814 *Cytoskeleton* 2003;54(1):29-40 doi: 10.1002/cm.10081.
- 815 20. Neff RJ, Ray SA, Benton WF, Wilborn M. Induction of synchronous encystment  
816 (differentiation) in *Acanthamoeba* sp. *Methods Cell Biol* 1964;1:55-83 doi:  
817 10.1016/S0091-679X(08)62086-5
- 818 21. Jensen T, Barnes WG, Meyers D. Axenic cultivation of large populations  
819 of *Acanthamoeba castellanii* (JBM). *J Parasitol* 1970;56(5):904-6 doi:  
820 10.2307/3277503.
- 821 22. Lloyd D. Encystment in *Acanthamoeba castellanii*: a review. *Exp Parasitol*  
822 2014;145:Suppl:20-7 doi: 10.1016/j.exppara.2014.03.026.
- 823 23. Bowers B, Korn ED. The fine structure of *Acanthamoeba castellanii* (Neff strain). II.  
824 Encystment. *J Cell Biol* 1969;41(3): 786-805 doi: 10.1083/jcb.41.3.786.
- 825 24. Chávez-Munguía B, Omaña-Molina M, González-Lázaro M, González-Robles A, Bonilla  
826 P, Martínez-Palomo A. Ultrastructural study of encystation and excystation in

- 827 *Acanthamoeba castellanii*. J Eukaryot Microbiol 2005;52(2):153-8 DOI |  
828 10.1111/j.1550-7408.2005.04-3273.
- 829 25. Lemgruber L, Lupetti P, De Souza W, Vommaro RC, da Rocha-Azevedo B. The fine  
830 structure of the *Acanthamoeba polyphaga* cyst wall. FEMS Microbiol Lett  
831 2010;305(2):170-6 doi: 10.1111/j.1574-6968.2010.01925.
- 832 26. Chambers JA, Thompson JE. A scanning electron microscopic study of the excystment  
833 process of *Acanthamoeba castellanii*. Exp Cell Res 1972;73(2):415-21 doi:  
834 10.1016/0014-4827(72)90066-3.
- 835 27. Coulon C, Collignon A, McDonnell G, Thomas V. Resistance of *Acanthamoeba* cysts to  
836 disinfection treatments used in health care settings. J Clin Microbiol 2010;48(8): 2689-  
837 2697 doi: 10.1128/JCM.00309-10.
- 838 28. Dupuy M, Berne F, Herbelin P, Binet M, Berthelot N, Rodier MH, et al. Sensitivity of  
839 free-living amoeba trophozoites and cysts to water disinfectants. Int J Hyg Environ  
840 Health 2014(2-3);217:335-9 doi: 10.1016/j.ijheh.2013.07.007.
- 841 29. Ezz Eldin HM, Sarhan RM. Cytotoxic effect of organic solvents and surfactant agents on  
842 *Acanthamoeba castellanii* cysts. Parasitol Res. 2014;113(5):1949-53 doi:  
843 10.1007/s00436-014-3845-5..
- 844 30. Lonnen J, Putt KS, Kernick ER, Lakkis C, May L, Pugh RB. The efficacy of  
845 *Acanthamoeba* cyst kill and effects upon contact lenses of a novel ultraviolet lens  
846 disinfection system. Am J Ophthalmol 2014;158(3):460-8 doi:  
847 10.1016/j.ajo.2014.05.032.

- 848 31. Flores BM, Garcia CA, Stamm WE, Torian BE. Differentiation of *Naegleria fowleri* from  
849 *Acanthamoeba* species by using monoclonal antibodies and flow cytometry. J Clin  
850 Microbiol 1990;28(9):1999-2005 doi: [jcm.asm.org/content/jcm/28/9/1999.full.pdf](https://doi.org/10.1128/jcm.28.9.1999-2005).
- 851 32. Hiwatashi E, Tachibanabi H, Kanedab Y, Obazawaa H. Production and characterization  
852 of monoclonal antibodies to *Acanthamoeba castellanii* and their application for detection  
853 of pathogenic *Acanthamoeba spp.* Parasitol Internat 1997;46(3):197-205 doi:  
854 [10.1016/S1383-5769\(97\)00029-9](https://doi.org/10.1016/S1383-5769(97)00029-9).
- 855 33. Leher H, Zaragoza F, Taherzadeh S, Alizadeh H, Niederkorn JY. Monoclonal IgA  
856 antibodies protect against *Acanthamoeba* keratitis. Exp Eye Res 1999;69(1):75-84 doi:  
857 [10.1006/exer.1999.0678](https://doi.org/10.1006/exer.1999.0678).
- 858 34. Turner ML, Cockerell EJ, Brereton HM, Badenoch PR, Tea M, Coster DJ, et al.  
859 Antigens of selected *Acanthamoeba* species detected with monoclonal antibodies. Int J  
860 Parasitol. 2005;35(9):981-90 doi: [10.1016/j.ijpara.2005.03.015](https://doi.org/10.1016/j.ijpara.2005.03.015).
- 861 35. Kang AY, Park AY, Shin HJ, Khan NA, Maciver SK, Jung SY. Production of a  
862 monoclonal antibody against a mannose-binding protein of *Acanthamoeba culbertsoni*  
863 and its localization. Exp Parasitol 2018;192:19-24 doi: [10.1016/j.exppara.2018.07.009](https://doi.org/10.1016/j.exppara.2018.07.009) .
- 864 36. Hirukawa Y, Nakato H, Izumi S, Tsuruhara T, Tomino S. Structure and expression of a  
865 cyst specific protein of *Acanthamoeba castellanii*. Biochim Biophys Acta  
866 1998;1398(1):47-56 doi: [10.1016/S0167-4781\(98\)00026-8](https://doi.org/10.1016/S0167-4781(98)00026-8).
- 867 37. Nielsen H. Predicting Secretory Proteins with SignalP. Methods Mol Biol 2017;1611:59-  
868 73 doi: [10.1007/978-1-4939-7015-5\\_6](https://doi.org/10.1007/978-1-4939-7015-5_6).
- 869 38. Potter JL, Weisman RA. Cellulose synthesis by extracts of *Acanthamoeba castellanii*  
870 during encystment. Stimulation of the incorporation of radioactivity from UDP-



- 871 (14C)glucose into alkali-soluble and insoluble beta-glucans by glucose 6-phosphate and  
872 related compounds. *Biochim Biophys Acta* 1976;428(1):240-52 doi: 10.1016/0304-  
873 4165(76)90125-2.
- 874 39. Derda M, Winięcka-Krusnell J, Linder MB, Linder E. Labeled *Trichoderma reesei*  
875 cellulase as a marker for *Acanthamoeba* cyst wall cellulose in infected tissues. *Appl*  
876 *Environ Microbiol.* 2009;75(21):6827-30 doi: 10.1128/AEM.01555-09.
- 877 40. Dudley R, Jarroll EL, Khan NA. Carbohydrate analysis of *Acanthamoeba castellanii*.  
878 *Exp Parasitol.* 2009;122(4):338-43 doi: 10.1016/j.exppara.2009.04.009.
- 879 41. Urbanowicz BR, Catalá C, Irwin D, Wilson DB, Ripoll DR, Rose JK. A tomato endo-  
880 beta-1,4-glucanase, SlCel9C1, represents a distinct subclass with a new family of  
881 carbohydrate binding modules (CBM49). *J Biol Chem* 2007;282(16):12066-74 DOI:  
882 10.1074/jbc.M607925200.
- 883 42. Lombard V, Golaconda Ramulu H, Drula E, Coutinho PM, Henrissat B. The  
884 Carbohydrate-active enzymes database (CAZy) in 2013. *Nucleic Acids Res* 2014;42  
885 (Database issue):D490–D495 doi: 10.1093/nar/gkt1178.
- 886 43. Finn RD, Attwood TK, Babbitt PC, Bateman A, Bork P, Bridge AJ, et al. InterPro in 2017  
887 — beyond protein family and domain annotations. *Nucleic Acids*  
888 *Res* 2017;45(D1):D190-D199 doi: 10.1093/nar/gkw1107.
- 889 44. Samuelson J, Bushkin GG, Chatterjee A, Robbins PW. Strategies to discover the  
890 structural components of cyst and oocyst walls. *Eukaryot Cell* 2013;12(2):1578-87 doi:  
891 10.1128/EC.00213-13.

- 892 45. Altschul SF, Madden TL, Schäffer AA, Zhang J, Zhang Z, Miller W, et al. Gapped  
893 BLAST and PSI-BLAST: a new generation of protein database search programs.  
894 Nucleic Acids Res 1997;25:3389-3402 doi: 10.1093/nar/25.17.3389
- 895 46. Das S, Van Dellen K, Bulik D, Magnelli P, Cui J, Head J, et al. The cyst wall of  
896 *Entamoeba invadens* contains chitosan (deacetylated chitin). Mol Biochem Parasitol  
897 2006;148(1):86-92 doi: 10.1016/j.molbiopara.2006.03.002.
- 898 47. Aurrecochea C, Barreto A, Brestelli J, Brunk BP, Caler EV, Fischer S, et al.  
899 AmoebaDB and MicrosporidiaDB: functional genomic resources for Amoebozoa and  
900 *Microsporidia* species. Nucleic Acids Res 2011;39:D612-9 doi: 10.1093/nar/gkq1006
- 901 48. Gonçalves IR, Brouillet S, Soulié MC, Gribaldo S, Sirven C, Charron N, et al. Genome-  
902 wide analyses of chitin synthases identify horizontal gene transfers towards bacteria  
903 and allow a robust and unifying classification into fungi. BMC Evol Biol 2016;16(1):252  
904 doi.org/10.1186/s12862-016-0815-9.
- 905 49. Morozov AA, Likhoshway YV. Evolutionary history of the chitin synthases of eukaryotes.  
906 Glycobiology 2016;26(6):635-9 doi: 10.1093/glycob/cww018.
- 907 50. Demmerle J, Innocent C, North AJ, Ball G, Müller M, et al. Strategic and practical  
908 guidelines for successful structured illumination microscopy. Nat Protoc 2017;12(5):988-  
909 1010 doi: 10.1038/nprot.2017.019.
- 910 51. Monheit JE, Cowan DF, Moore Dg. Rapid detection of fungi in tissues using calcofluor  
911 white and fluorescence microscopy. Arch Pathol Lab Med 1984;108(8):616-8.
- 912 52. Shaw JA, Mol PC, Bowers B, Silverman SJ, Valdivieso MH, Durán A, et al. The function  
913 of chitin synthases 2 and 3 in the *Saccharomyces cerevisiae* cell cycle. J Cell Biol  
914 1991;114(1):111-23 DOI: 10.1083/jcb.114.1.111.

- 915 53. Frisardi M, Ghosh SK, Field J, Van Dellen K, Rogers R, Robbins P, et al. The most  
916 abundant glycoprotein of amebic cyst walls (Jacob) is a lectin with five Cys-rich, chitin-  
917 binding domains. *Infect Immun* 2000;68(7):4217-24 DOI: 10.1128/IAI.68.7.4217-  
918 4224.2000.
- 919 54. Said-Fernández S, Campos-Góngora E, González-Salazar F, Martínez-Rodríguez HG,  
920 Vargas-Villarreal J, Viader-Salvadó JM. Mg<sup>2+</sup>, Mn<sup>2+</sup>, and Co<sup>2+</sup> stimulate *Entamoeba*  
921 *histolytica* to produce chitin-like material. *J Parasitol* 2001;87(4):919-23 DOI:  
922 10.1645/0022-3395(2001)087[0919:MMACSE]2.0.CO;2.
- 923 55. Wilhelmus KR, Osato MS, Font RL, Robinson NM, Jones DB. Rapid diagnosis of  
924 *Acanthamoeba* keratitis using calcofluor white. *Arch Ophthalmol* 1986;104(9):1309-12  
925 doi:10.1001/archopht.1986.01050210063026.
- 926 56. Smith DB. Generating fusions to glutathione S-transferase for protein studies. *Methods*  
927 *Enzymol* 2000;326:254-70 doi: 10.1016/S0076-6879(00)26059.
- 928 57. Vanhecke D, Graber W, Studer D. Close-to-native ultrastructural preservation by high  
929 pressure freezing. *Methods Cell Biol* 2008;88:151-64 doi: 10.1016/S0091-  
930 679X(08)00409-3.
- 931 58. Marchler-Bauer A, Derbyshire MK, Gonzales NR, Lu S, Chitsaz F, Geer LY, et al. CDD:  
932 NCBI's conserved domain database. *Nucleic Acids Res* 2015;43(Database issue):D222-  
933 6. doi: 10.1093/nar/gku1221.
- 934 59. Eisenhaber B, Bork P, Eisenhaber F. Prediction of potential GPI-modification sites in  
935 proprotein sequences. *J Mol Biol* 1999;292(3):741-58 DOI: 10.1006/jmbi.1999.3069.

- 936 60. Krough A, Larsson B, von Heijne G, Sonnhammer EL. Predicting transmembrane  
937 protein topology with a hidden Markov model: application to complete genomes. *J Mol*  
938 *Biol.* 2001;305(3):567-80 doi.org/10.1006/jmbi.2000.4315.
- 939 61. Kapust RB, Waugh DS. *Escherichia coli* maltose-binding protein is uncommonly  
940 effective at promoting the solubility of polypeptides to which it is fused. *Protein Sci*  
941 1999;8(8):1668-74 DOI: 10.1110/ps.8.8.1668.
- 942 62. Peng Z, Omaruddin R, Bateman E. Stable transfection of *Acanthamoeba castellanii*.  
943 *Biochim Biophys Acta* 2005;1743(1-2):93-100 DOI: 10.1016/j.bbamcr.2004.08.014.
- 944 63. Bateman E. Expression plasmids and production of EGFP in stably transfected  
945 *Acanthamoeba*. *Protein Expr Purif* 2010;70(1):95-100. doi: 10.1016/j.pep.2009.10.008.
- 946 64. Xu Y, Liang X, Chen Y, Koehler TM, Hook M. Identification and biochemical  
947 characterization of two novel collagen binding MSCRAMMs of *Bacillus anthracis*. *J Biol*  
948 *Chem.* 2004;279(50):51760-8 DOI: 10.1074/jbc.M406417200.
- 949 65. Enguita FJ, Martins LO, Henriques AO, Carrondo MA. Crystal structure of a bacterial  
950 endospore coat component. A laccase with enhanced thermostability properties. *J Biol*  
951 *Chem* 2003;278(21):19416-2 DOI: 10.1074/jbc.M301251200.
- 952 66. Kiiskinen LL, Palonen H, Linder M, Viikari L, Kruus K. Laccase from *Melanocarpus*  
953 *albomyces* binds effectively to cellulose. *FEBS Lett.* 2004;576(1-2):251-5 DOI:  
954 10.1016/j.febslet.2004.08.040.
- 955 67. Moon EK, Chung DI, Hong YC, Kong HH. Characterization of a serine proteinase  
956 mediating encystation of *Acanthamoeba*. *Eukaryot Cell.* 2008 Sep;7(9):1513-7 doi:  
957 10.1128/EC.00068-08.

- 958 68. Corsaro D, Köhler M, Montalbano Di Filippo M, Venditti D, Monno R, et al. Update on  
959 *Acanthamoeba jacobsi* genotype T15, including full-length 18S rDNA molecular  
960 phylogeny. Parasitol Res. 2017 Apr;116(4):1273-1284. doi: 10.1007/s00436-017-5406-  
961 1.
- 962 69. Chen L, Orfeo T, Gilmartin G, Bateman E. Mechanism of cyst specific protein 21 mRNA  
963 induction during *Acanthamoeba* differentiation. Biochim Biophys Acta 2004;1691(1):23-  
964 31 DOI: 10.1016/j.bbamcr.2003.11.005.
- 965 70. Vollmer AC, Bark SJ. Twenty-Five Years of Investigating the Universal Stress Protein:  
966 Function, Structure, and Applications. Adv Appl Microbiol. 2018;102:1-36 doi:  
967 10.1016/bs.aambs.2017.10.001.
- 968 71. Chatterjee A, Ghosh SK, Jang K, Bullitt E, Moore L, Robbins PW, Samuelson J.  
969 Evidence for a "wattle and daub" model of the cyst wall of entamoeba. PLoS Pathog.  
970 2009;5(7):e1000498 DOI: 10.1371/journal.ppat.1000498.
- 971 72. Chatterjee A, Carpentieri A, Ratner DM, Bullitt E, Costello CE, Robbins PW, et al.  
972 *Giardia* cyst wall protein 1 is a lectin that binds to curled fibrils of the GalNAc  
973 homopolymer. PLoS Pathog. 2010;6(8):e1001059 doi: 10.1371/journal.ppat.1001059.
- 974 73. Bushkin GG, Motari E, Magnelli P, Gubbels MJ, Dubey JP, Miska KB, et al.  $\beta$ -1,3-  
975 glucan, which can be targeted by drugs, forms a trabecular scaffold in the oocyst walls  
976 of *Toxoplasma* and *Eimeria*. MBio 2012;3(5): e00258-12. doi: 10.1128/mBio.00258-12.
- 977 74. Van Dellen K, Ghosh SK, Robbins PW, Loftus B, Samuelson J. *Entamoeba histolytica*  
978 lectins contain unique 6-Cys or 8-Cys chitin-binding domains. Infect Immun  
979 2002;70(6):3259-63 DOI: 10.1128/IAI.70.6.3259-3263.2002.

- 980 75. Vinayak S, Pawlowic MC, Sateriale A, Brooks CF, Studstill CJ, Bar-Peled Y, et al.  
981 Genetic modification of the diarrhoeal pathogen *Cryptosporidium parvum*. *Nature*  
982 2015;523(7561):477-80 doi: 10.1038/nature14651.
- 983 76. Lee S, Ginese M, Beamer G, Danz HR, Girouard DJ, Chapman-Bonofiglio SP, et al.  
984 Therapeutic Efficacy of Bumped Kinase Inhibitor 1369 in a Pig Model of Acute Diarrhea  
985 Caused by *Cryptosporidium hominis*. *Antimicrob Agents Chemother* 2018;62(7):  
986 e00147-18. doi: 10.1128/AAC.00147-18.
- 987 77. Cherif M, Benhamou N, Blanger RR. Occurrence of cellulose and chitin in the hyphal  
988 walls of *Pythium ultimum*: a comparative study with other plant pathogenic fungi. *Can J*  
989 *Microbiol* 1993;39(2):212-223 doi: 10.1139/m93-030.
- 990 78. West CM. Comparative analysis of spore coat formation, structure, and function in  
991 *Dictyostelium*. *Int Rev Cytol* 2003;222:237-93 doi.org/10.1016/S0074-7696(02)22016-1.
- 992 79. West CM, Nguyen P, van der Wel H, Metcalf T, Sweeney KR, Blader IJ, et al.  
993 Dependence of stress resistance on a spore coat heteropolysaccharide in  
994 *Dictyostelium*. *Eukaryot Cell* 2009;8(1):27-36. doi: 10.1128/EC.00398-07.
- 995 80. Ghosh SK, Van Dellen KL, Chatterjee A, Dey T, Haque R, Robbins PW, et al. The  
996 Jacob2 lectin of the *Entamoeba histolytica* cyst wall binds chitin and is polymorphic.  
997 *PLoS Negl Trop Dis* 2010;4(7):e750 doi: 10.1371/journal.pntd.0000750.
- 998 81. Wang Y, Slade MB, Gooley AA, Atwell BJ, Williams KL. Cellulose-binding modules from  
999 extracellular matrix proteins of *Dictyostelium discoideum* stalk and sheath. *Eur J*  
1000 *Biochem*. 2001;268(15):4334-45 doi: 10.1046/j.1432-1327.2001.02354.

- 1001 82. CAZypedia Consortium. Ten years of CAZypedia: a living encyclopedia of  
1002 carbohydrate-active enzymes. *Glycobiology* 2018;28(1):3-8. doi:  
1003 10.1093/glycob/cwx089.
- 1004 83. Van Dellen KL, Chatterjee A, Ratner DM, Magnelli PE, Cipollo JF, Steffen M, et al.  
1005 Unique posttranslational modifications of chitin-binding lectins of *Entamoeba invadens*  
1006 cyst walls. *Eukaryot Cell* 2006;5(5):836-48 DOI: 10.1128/EC.5.5.836-848.2006.
- 1007 84. Shen Z, Jacobs-Lorena M. A type I peritrophic matrix protein from the malaria vector  
1008 *Anopheles gambiae* binds to chitin. Cloning, expression, and characterization. *J Biol*  
1009 *Chem* 1998;273(28):17665-70 doi: 10.1074/jbc.273.28.17665.
- 1010 85. Maeda H, Ishida N. Specificity of binding of hexopyranosyl polysaccharides with  
1011 fluorescent brightener. *J Biochem* 1967;62(2):276-8 .
- 1012 86. Cabib E, Arroyo J. How carbohydrates sculpt cells: chemical control of morphogenesis  
1013 in the yeast cell wall. *Nat Rev Microbiol* 2013;11(9):648-55 DOI: 10.1038/nrmicro3090.
- 1014 87. Etienne-Manneville S, Hall A. Rho GTPases in cell biology. *Nature* 2002;420(6916):629-  
1015 35 DOI: 10.1038/nature01148.
- 1016 88. Stibbs HH. Monoclonal antibody-based enzyme immunoassay for *Giardia lamblia*  
1017 antigen in human stool. *J Clin Microbiol* 1989;27(11):2582-8.
- 1018 89. Spadafora LJ, Kearney MR, Siddique A, Ali IK, Gilchrist CA, Arju T, et al. Species-  
1019 Specific Immunodetection of an *Entamoeba histolytica* Cyst Wall Protein. *PLoS Negl*  
1020 *Trop Dis* 2016;10(5):e0004697. doi: 10.1371/journal.pntd.0004697.
- 1021 90. Chaudhary PM, Tupe SG, Deshpande MV. Chitin synthase inhibitors as antifungal  
1022 agents. *Mini Rev Med Chem* 2013;13(2):222-36 DOI : 10.2174/1389557511313020005.

- 1023 91. Aqeel Y, Siddiqui R, Khan NA. Silencing of xylose isomerase and cellulose synthase by  
1024 siRNA inhibits encystation in *Acanthamoeba castellanii*. Parasitol Res 2013;112:1221-7  
1025 DOI 10.1007/s00436-012-3254-6
- 1026 92. Moon EK, Hong Y, Chung DI, Goo YK, Kong HH. Down-regulation of cellulose synthase  
1027 inhibits the formation of endocysts in *Acanthamoeba*. Korean J Parasitol 2014;52:131-5  
1028 DOI:10.3347/kjp.2014.52.2.131.
- 1029 93. Moon EK, Hong Y, Chung DI, Goo YK, Kong HH. Potential Value of Cellulose Synthesis  
1030 Inhibitors Combined With PHMB in the Treatment of *Acanthamoeba* Keratitis. Cornea.  
1031 2015;34(12):1593-8 doi: 10.1097/ICO.0000000000000642.
- 1032 94. Lakhundi S, Siddiqui R, Khan NA. Cellulose degradation: a therapeutic strategy in the  
1033 improved treatment of *Acanthamoeba* infections. Parasit Vectors 2015;8:23 doi:  
1034 10.1186/s13071-015-0642-7.
- 1035 95. Vizcaino JA, Deutsch EW, Wang R, Csordas A, Reisinger F, Rios D, et al.  
1036 ProteomeXchange provides globally coordinated proteomics data submission and  
1037 dissemination. Nat Biotechnol 2014;32(3):223-6 doi: 10.1038/nbt.2839

1038 **Figure legends.**

1039 **Figure. 1. SIM shows purified cyst walls retain distinct ectocyst and endocyst**  
1040 **layers, as well as ostioles.** A. After six hr encystation, a GST-AcCBM49 in red and WGA in  
1041 green each label dozens of small vesicles, which do not appear to overlap. CFW in blue is  
1042 difficult to see, so overlaps with GST-AcCBM49 and WGA cannot be judged. B. After 12 hr,  
1043 WGA is still prominently in vesicles, while all three probes bind to a single-layered cyst wall,  
1044 which contains small, flat ostioles visible only with CFW. C. After 36 hr, GST-AcCBM49  
1045 predominantly labels the ectocyst layer; WGA diffusely labels both ectocyst and endocyst



1046 layers and labels ostioles in a punctate manner; while CFW labels endocyst and ostioles. The  
1047 ectocyst layer of intact (D) and purified *A. castellanii* cyst walls (E) labels with GST-AcCBM49;  
1048 the edges of ostioles label with WGA; and the endocyst layer labels with CFW. Scale bars are  
1049 2  $\mu\text{m}$ .

1050 **Figure 2. TEM also shows purified cyst walls retain endocyst and ectocyst layers**  
1051 **and ostioles.** A, B. Intact and purified *A. castellanii* cyst walls have an outer ectocyst layer  
1052 (red arrows), an inner endocyst layer (blue arrows), and ostioles (green arrows) that connect  
1053 the layers. Endocyst and ectocyst layers have the same appearance in intact cysts (C) and  
1054 purified cyst walls (D). Purified cyst walls are missing amorphous material (purple arrow)  
1055 between the wall and the plasma membrane of intact cysts. E. At the edge of the ostiole of an  
1056 intact cyst, the endocyst layer bifurcates, and the outer branch (yellow arrow) meets the  
1057 ectocyst layer. In the center of the ostiole, the ectocyst layer (pink arrow) forms a narrow cap  
1058 over the inner branch of the endocyst layer (pale green arrow). Scale bars as marked on  
1059 micrographs.

1060 **Figure 3. Representative proteins of abundant families of CWPs contain two**  
1061 **CBM49s (Luke(2) lectin), two 8-Cys domains (Leo lectin), or one CAA domain (Jonah(1)**  
1062 **lectin) .** A representative Luke lectin has an N-terminal signal peptide (purple) and two  
1063 CBM49s separated by short Ser- and Pro-rich spacers (light blue). The N-terminal CBM49  
1064 contains four Trp residues (red Ws), three of which are conserved in a C-terminal CBM49 of a  
1065 tomato cellulase (larger font) and three of which are conserved in a single CBM49 of  
1066 *Dictyostelium* spore coat proteins (underlined). The C-terminal CBM49 has two conserved Trp  
1067 residues, which are also present in the middle and C-terminal CBM49s of Luke(3) lectins (S2  
1068 Fig). A 50-amino acid peptide used to immunize rabbits is underlined. A representative Leo

1069 lectin has a signal peptide and two unique domains (dark blue) containing eight Cys residues  
1070 each (red Cs). Leo(TKH) lectins have a Thr-,Lys- and His-rich domain between 8-Cys domain  
1071 (S2 Fig). A 16-amino acid peptide used to immunize rabbits is underlined. A representative  
1072 Jonah(1) has a signal peptide, a Thr-, Lys-, and Cys-rich domain (tan), and a single CAA  
1073 domain (green). Jonah(3) lectins have three CAA domains, hydrophobic domains and Ser- and  
1074 Pro-rich spacers (S2 Fig). A 50-amino acid peptide used to immunize rabbits is underlined.  
1075 Localization of GFP-tagged CWPs expressed in transformed protists is shown in Figs 4 to 6.  
1076 Binding of MBP-CWP fusions to encysting organisms and mature cysts and to microcrystalline  
1077 cellulose and chitin beads are shown in Figs 7 and 8, respectively.

1078 **Fig. 4. SIM shows a representative Jonah(1) lectin tagged with GFP and**  
1079 **expressed under its own promoter is made early during encystation and localizes to the**  
1080 **ectocyst layer of mature cyst walls.** A Jonah(1) lectin with a single CAA domain, which was  
1081 tagged with GFP and expressed under its own promoter in transfected *A. castellanii*, is not  
1082 expressed by trophozoites (data not shown). A. In contrast, after six hr encystation, Jonah(1)-  
1083 GFP (green) is present in dozens of small encystation-specific vesicles, which do not overlap  
1084 with WGA-labeled vesicles (red) containing chitin. B. After 15 hr encystation, Jonah(1)-GFP  
1085 has a fibrillar appearance in the single-layered, primordial cyst wall, which also labels with  
1086 WGA and CFW. Small, flat ostioles are labeled by CFW but are not visible with Jonah(1)-GFP  
1087 or WGA. C. After 24 hr encystation, Jonah(1)-GFP remains with the ectocyst layer, while WGA  
1088 and CFW predominantly label the endocyst layer and ostioles. D. Jonah(1)-GFP localizes to  
1089 the ectocyst layer of the wall of mature cysts; WGA labels both ectocyst and endocyst layers;  
1090 while CFW labels the endocyst layer and ostioles. E. Jonah(1)-GFP expressed under a  
1091 GAPDH promoter also localizes to the ectocyst layer. F. Anti-GFP antibodies bind to 100% of

1092 mature cysts expressing Jonah(1)-GFP. A to F. Scale bars are 2  $\mu$ m. Methods and primers for  
1093 making Jonah(1)-GFP and other constructs are shown in S1 Fig and S3 Excel file. Widefield  
1094 micrographs of groups of cysts expressing Jonah(1)-GFP and other CWPs under their own  
1095 promoters are shown in S3 Fig. RT-PCR of mRNAs of trophozoites and encysting organisms  
1096 with primers to Jonah(1) and other CWPs are shown in S4 Fig. Western blots of rabbit anti-  
1097 Jonah(1) and anti-Leo anti-antibodies to trophozoites and cyst proteins are shown in S5 Fig.  
1098 Widefield and DIC micrographs of trophozoites and cysts expressing Jonah(1)-GFP, Luke(2)-  
1099 GFP, and GFP alone under the GAPDH promoter are shown in S6 Fig.

1100 **Figure 5. A representative Luke(2) lectin is made later during encystation, marks**  
1101 **small, flat ostioles in developing cyst walls, and is present in the endocyst layer and at**  
1102 **the edges of conical ostioles in mature cyst walls.** A representative Luke(2) lectin with two  
1103 CBM49s, which was tagged with GFP and expressed under its own promoter in transfected *A.*  
1104 *castellanii*, is not expressed by trophozoites and is difficult to visualize during the first 12 hr of  
1105 encystation (data not shown). A, B. After 15 and 18 hr encystation, Luke(2)-GFP (green)  
1106 sharply outlines a subset of small, flat ostioles, which are also visible with CFW (blue) but not  
1107 with WGA (red). In a more developed cyst wall (lower right), Luke(2)-GFP also coats the  
1108 endocyst layer. C. After 24 hr encystation, Luke(2)-GFP is diffusely present in the endocyst  
1109 layer and ostioles, which are labeled with WGA and CFW. D. Luke(2)-GFP is diffusely present  
1110 in the endocyst layer and sharply outlines conical ostioles of mature cysts. E. Luke(2)-GFP  
1111 expressed under a GAPDH promoter is also present in the endocyst layer and sharply outlines  
1112 conical ostioles of mature cysts. F. Luke(3) with three CBM49s, tagged with GFP and  
1113 expressed under its own promoter, is also present in the endocyst layer and ostioles. A to F.  
1114 Scale bars are 2  $\mu$ m.

1115 **Figure 6. A representative Leo lectin is also made later during encystation and is**  
1116 **present in the endocyst layer and at the edges of conical ostioles in mature cyst walls.**

1117 A representative Leo lectin with two 8-Cys domains, which was tagged with GFP and  
1118 expressed under its own promoter in transfected *A. castellanii*, is not expressed by  
1119 trophozoites and is difficult to visualize during the first 12 hr of encystation (data not shown). A.  
1120 After 15 hr encystation, Leo-GFP (green) is present in dozens of encystation-specific vesicles  
1121 and is weakly present in the single-layered, primordial cyst wall, which is diffusely labeled red  
1122 with WGA. In contrast, CFW alone labels small, flat ostioles. B. At 18 hr, Leo-GFP forms  
1123 patches on the cyst wall, which are for the most part independent of ostioles. Only at 36 hr (C)  
1124 does Leo-GFP accumulate at the edges of the ostioles, which is its location in mature cysts  
1125 (D). Control cysts show punctate labeling of CSP21-GFP expressed under its own promoter  
1126 (E) and GFP with a signal peptide from the N-terminus of Luke(2) lectin expressed under a  
1127 GAPDH promoter (F). A to F. Scale bars are 2  $\mu$ m.

1128 **Figure 7. MBP-CWP fusions show glycopolymers bound by Jonah(1) lectin are**  
1129 **accessible in the ectocyst layer of mature cyst walls, while glycopolymers bound by**  
1130 **Luke(2) and Leo lectins are much less accessible in the endocyst layer and ostioles.**

1131 After 12 hr encysting, MBP-Jonah (A), MBP-Luke(2) (C), and MBP-Leo (E), each labels  
1132 vesicles in nearly 100% of organisms, the primordial walls of which are labeled green with  
1133 WGA and blue with CFW. While MBP-Jonah(2) labels the ectocyst layer of nearly 100% of  
1134 mature cysts (B), MBP-Luke(2) (D) and MBP-Leo (F) each label the endocyst layer and  
1135 ostioles of <10% of mature cysts. A to F. Scale bars are 2  $\mu$ m. Widefield micrographs of  
1136 groups of mature cysts labeled with MBP-CWP fusions are shown in S7 Fig.

1137 **Figure 8. Representative Western blots of pull-downs with microcrystalline**

1138 **cellulose and chitin beads show Luke, Leo, and Jonah lectins all bind cellulose, while**  
1139 **binding to chitin is variable.** Luke(2)-GFP, Jonah(1)-GFP, and GFP alone were each  
1140 expressed under the GAPDH promoter in transfected *A. castellanii* (S1 and S6 Figs), extracted  
1141 from lysed trophozoites, and incubated with microcrystalline cellulose (A) or chitin beads (B).  
1142 Total proteins (T), bound proteins (B), and unbound proteins (U), as well as molecular weight  
1143 markers (M), were run on SDS-PAGE, transferred to PVDF membranes, and detected with an  
1144 anti-GFP reagent. Full-length products in total fractions are underlined in red. Luke(2)-GFP,  
1145 which included some breakdown products, bound completely to microcrystalline cellulose (A)  
1146 and partially to chitin (C). Jonah(1)-GFP, which also included some breakdown products,  
1147 bound partially to microcrystalline cellulose but not at all to chitin. GFP alone (negative control)  
1148 did not bind to cellulose or chitin. MBP-CWP fusions and MBP alone were made as  
1149 recombinant proteins in the periplasm of bacteria and detected with an antibody to MBP. MBP-  
1150 Leo partially bound to microcrystalline cellulose and bound weakly, if at all to chitin. MBP-  
1151 Luke(2) and MBP-Jonah(1) each bound more completely to cellulose and partially to chitin,  
1152 while MBP alone (negative control) did not bind to cellulose and chitin.

1153 **Supplemental files:**

1154 **S1 Figure. Constructs made to localize CWPs and the glycopolymers to which**  
1155 **they bind in encysting organisms and mature cysts and to determine their binding to**  
1156 **microcrystalline cellulose and chitin beads.** A. A representative Luke(2) lectin with two  
1157 CBM49s was used to make GFP-, GST-, and MBP-fusions, and a representative Luke(3) lectin  
1158 with three CBM49s was used to make GFP-fusions. B, C. Representative Leo and Jonah(1)  
1159 lectins were made into GFP- and MBP-fusions. D. Vectors for expressing GFP-fusions in

1160 transfected *A. castellanii* under its own promoter or a constitutive GAPDH promoter contained  
1161 a neomycin resistance gene under a TATA-binding protein promoter [62, 63]. Primers for  
1162 making constructs are listed in S3 Excel file.

1163 **S2 Figure. Sequences of representative candidate CWPs with three CBM49s**  
1164 **(Luke(3) lectin), two 8-Cys domains separated by a Thr-, Lys-, and His-rich domain**  
1165 **(Leo(TKH) lectin), or three CAA domains (Jonah(3) lectin).** A representative Luke(3) lectin  
1166 has an N-terminal signal peptide (purple) and three CBM49s separated by short Ser- and Pro-  
1167 rich spacers (light blue). The CBM49s contain conserved Trp (red Ws) present in Luke(2) lectin  
1168 (Fig 3). B. A representative Leo(TKH) lectin has a signal peptide, two domains containing eight  
1169 Cys residues each (red Cs), and a Thr-,Lys- and His-rich spacer (brown). C. A representative  
1170 Jonah(3) has three CAA domains (green), hydrophobic regions (tan), and short Ser- and Pro-  
1171 rich spacers (light blue). The representative Luke(3) lectin, expressed with a GFP tag under its  
1172 own promoter, localizes to the endocyst layer and ostioles (Fig 5).

1173 **S3 Figure. Widefield micrographs of mature cysts expressing GFP-labeled CWPs**  
1174 **show Jonah(1) lectin is accessible to anti-GFP antibodies, while Luke(2) and Leo-GFP**  
1175 **are poorly accessible.** A to C. Cysts expressing Jonah(1)-GFP, Luke(2)-GFP, and Leo-GFP  
1176 (green), each under its own promoter, were labeled with WGA (red) and CFW (blue). D to F.  
1177 Anti-GFP antibodies (red) show that Jonah(1)-GFP, which localizes to the ectocyst layer by  
1178 SIM (Fig 4), is accessible in nearly 100% of organisms. In contrast, Luke(2)-GFP and Leo-  
1179 GFP, which localize to the endocyst layer and ostioles, were accessible in 3% and 2% of cysts,  
1180 respectively. A to F. Scale bars are 5  $\mu$ m.

1181 **S4 Figure. RT-PCR shows mRNAs of representative Luke(2), Leo, and Jonah(1)**  
1182 **lectins, as well as those of cellulose synthase, are encystation-specific.** DNA and total

1183 RNA was extracted from trophozoites and organisms encysting for one to three days. RT-  
1184 PCRs were performed with primers specific for segments of each CWP mRNA, as well as  
1185 primers specific for segments of mRNAs for GAPDH and cellulose synthase (see S3 Excel  
1186 file). PCR with DNA was used as a positive control, while omission of reverse-transcriptase (-  
1187 RT) was used as a negative control. Messenger RNAs encoding CWPs and cellulose synthase  
1188 are absent or nearly absent in trophozoites but are easily detectable in encysting organisms. In  
1189 contrast, mRNAs for GAPDH are expressed by trophozoites and encysting organisms. These  
1190 results support encystation-specific expression of GFP-tagged CWPs under their own  
1191 promoters (Figs 4 to 6).

1192 **S5 Figure. Western blots with rabbit antibodies to peptides of Leo and Jonah(1)**  
1193 **lectins show each CWP is absent in trophozoites but is easily detected in mature cysts.**  
1194 Proteins of lysed trophozoites and cysts (Coomassie blue stain in A), as well as MBP alone,  
1195 MBP-Jonah(1), or MBP-Leo, were separated on SDS-PAGE, transferred to PVDF membranes,  
1196 and incubated with rabbit antibodies to a 50-amino acid peptide of Jonah(1) (B) or to a 16-  
1197 amino acid peptide of Leo (C). Full-length products in lysed trophozoites and cysts are  
1198 underlined in red. Both rabbit antibodies bound to MBP-CWP fusions but not to MBP alone and  
1199 to proteins from cysts but not from trophozoites. These results confirm encystation-specific  
1200 expression of Jonah(1) and Leo (Figs 4 and 6). Rabbit antibodies to a 50-amino acid peptide of  
1201 Leo failed to bind to trophozoites or cysts. None of the rabbit antibodies bound to encysting  
1202 organisms or mature cyst walls when examined by widefield microscopy.

1203 **S6 Figure. Widefield and differential interference contrast (DIC) micrographs of**  
1204 **unfixed trophozoites (A) and cysts (B) expressing GFP-tagged CWPs under a GAPDH**  
1205 **promoter.** Luke(2)-GFP, Jonah(1)-GFP, and GFP alone (green), which were used for pull-

1206 downs with glycopolymers (Fig. 7), all express well in trophozoites, which maintain an  
1207 amoeboid appearance with numerous acanthopods. Luke(2)-GFP and Jonah(1)-GFP are  
1208 located in punctate vesicles of trophozoites and in the endocyst layer (Luke(2)-GFP) and  
1209 ectocyst layer (Jonah(1)-GFP) of mature cyst walls. CFW labels the endocyst layer of mature  
1210 cyst walls. In contrast, GFP alone remains in the cytosol of trophozoites and cysts. A, B. Scale  
1211 bars are 5  $\mu$ m.

1212 **S7 Figure. Widefield microscopy shows glycopolymers bound by MBP-Jonah(1)**  
1213 **are accessible in the ectocyst layer of mature cyst walls, while glycopolymers bound by**  
1214 **MBP-Luke(2) and MBP-Leo are, for the most part, inaccessible in the endocyst layer and**  
1215 **ostioles.** MBP-CWP fusions made in the periplasm of bacteria and purified on amylose resins  
1216 were used to label mature cyst walls, which were also labeled with WGA and CFW. Groups of  
1217 organisms were visualized in order to show that the Jonah(1) lectin binds to nearly 100% of  
1218 cysts, while Luke(2) and Leo lectins bind to at most one cyst per visual field. SIM of MBP-  
1219 fusions binding to individual encysting cells or mature cysts are shown in Fig. 7. A to C. Scale  
1220 bars are 5  $\mu$ m.

1221 **S8 Figure. Contrasting use of CBM49 by *A. castellanii* and *D. discoideum*.** CBM49,  
1222 which was first shown to be a cellulose-binding domain at the C-terminus of tomato cellulase,  
1223 is repeated two or three times in Luke lectins of *A. castellanii* and is also present at the N-  
1224 terminus of a metalloprotease. In contrast, CBM49 is present in a single copy in the majority of  
1225 *D. discoideum* proteins and as three copies in rare proteins. CBM49 is also present in two  
1226 copies in a *D. discoideum* cysteine protease and as a single copy in a GH5 glycoside  
1227 hydrolase.



1228 **S9 Figure. *A. castellanii* Leo lectins and *E. histolytica* Jacob lectins have common**  
1229 **structures even though they share no common ancestry (convergent evolution).**

1230 Abundant cyst wall proteins of *A. castellanii* (Leo lectins) and *E. histolytica* (Jacob lectins) have  
1231 unique 8-Cys or 6-Cys domains, respectively, that bind cellulose or chitin. In each protist,  
1232 some of the lectins lack spacers, while others have spacers rich in Thr, Lys, and His (*A.*  
1233 *castellanii*) or Ser and Thr (*E. histolytica*).

1234 **S10. Contrasting use of choice of anchor A (CAA) domains in *A. castellanii*,**  
1235 **oomycetes, and bacteria.** Jonah lectins, which are abundant in cyst walls of *A. castellanii*,  
1236 have one or three CAA domains. The former are preceded by Thr-, Lys-, and Cys-rich  
1237 sequences (gray), while the latter are separated by Ser- and Pro-rich spacers (blue) and  
1238 hydrophobic domains (tan). CAA domains of oomycetes (*Pyromyces* or *Neocallimastix*) have  
1239 three to five CAA domains, while the spore coat protein of *Bacillus* has a single CAA domain  
1240 attached to a collagen-binding domain, which is absent in *A. castellanii*.

1241 **S1 Excel file. Excel file listing the most abundant proteins identified by mass**  
1242 **spectrometry of cyst walls purified on the Percoll gradient and retained on a membrane**  
1243 **containing 8- $\mu$ m pores.** Proteins with <7 unique peptides have been removed, because they  
1244 are dominated by cytosolic contaminants. Luke, Leo, and Jonah lectins have been highlighted  
1245 in orange. Other candidate CWPs are marked in yellow.

1246 **S2 Excel file. Complete list of proteins identified by mass spectrometry including**  
1247 **a cyst wall preparation that was heavily contaminated with cytosolic proteins, because**  
1248 **the Percoll gradient and porous membrane were not used during their purification. We**  
1249 **have included proteins with at least two unique peptides.**

1250

**S3 Excel file. Primers used for construction of GST-, GFP-, and MBP-fusions.**

1251

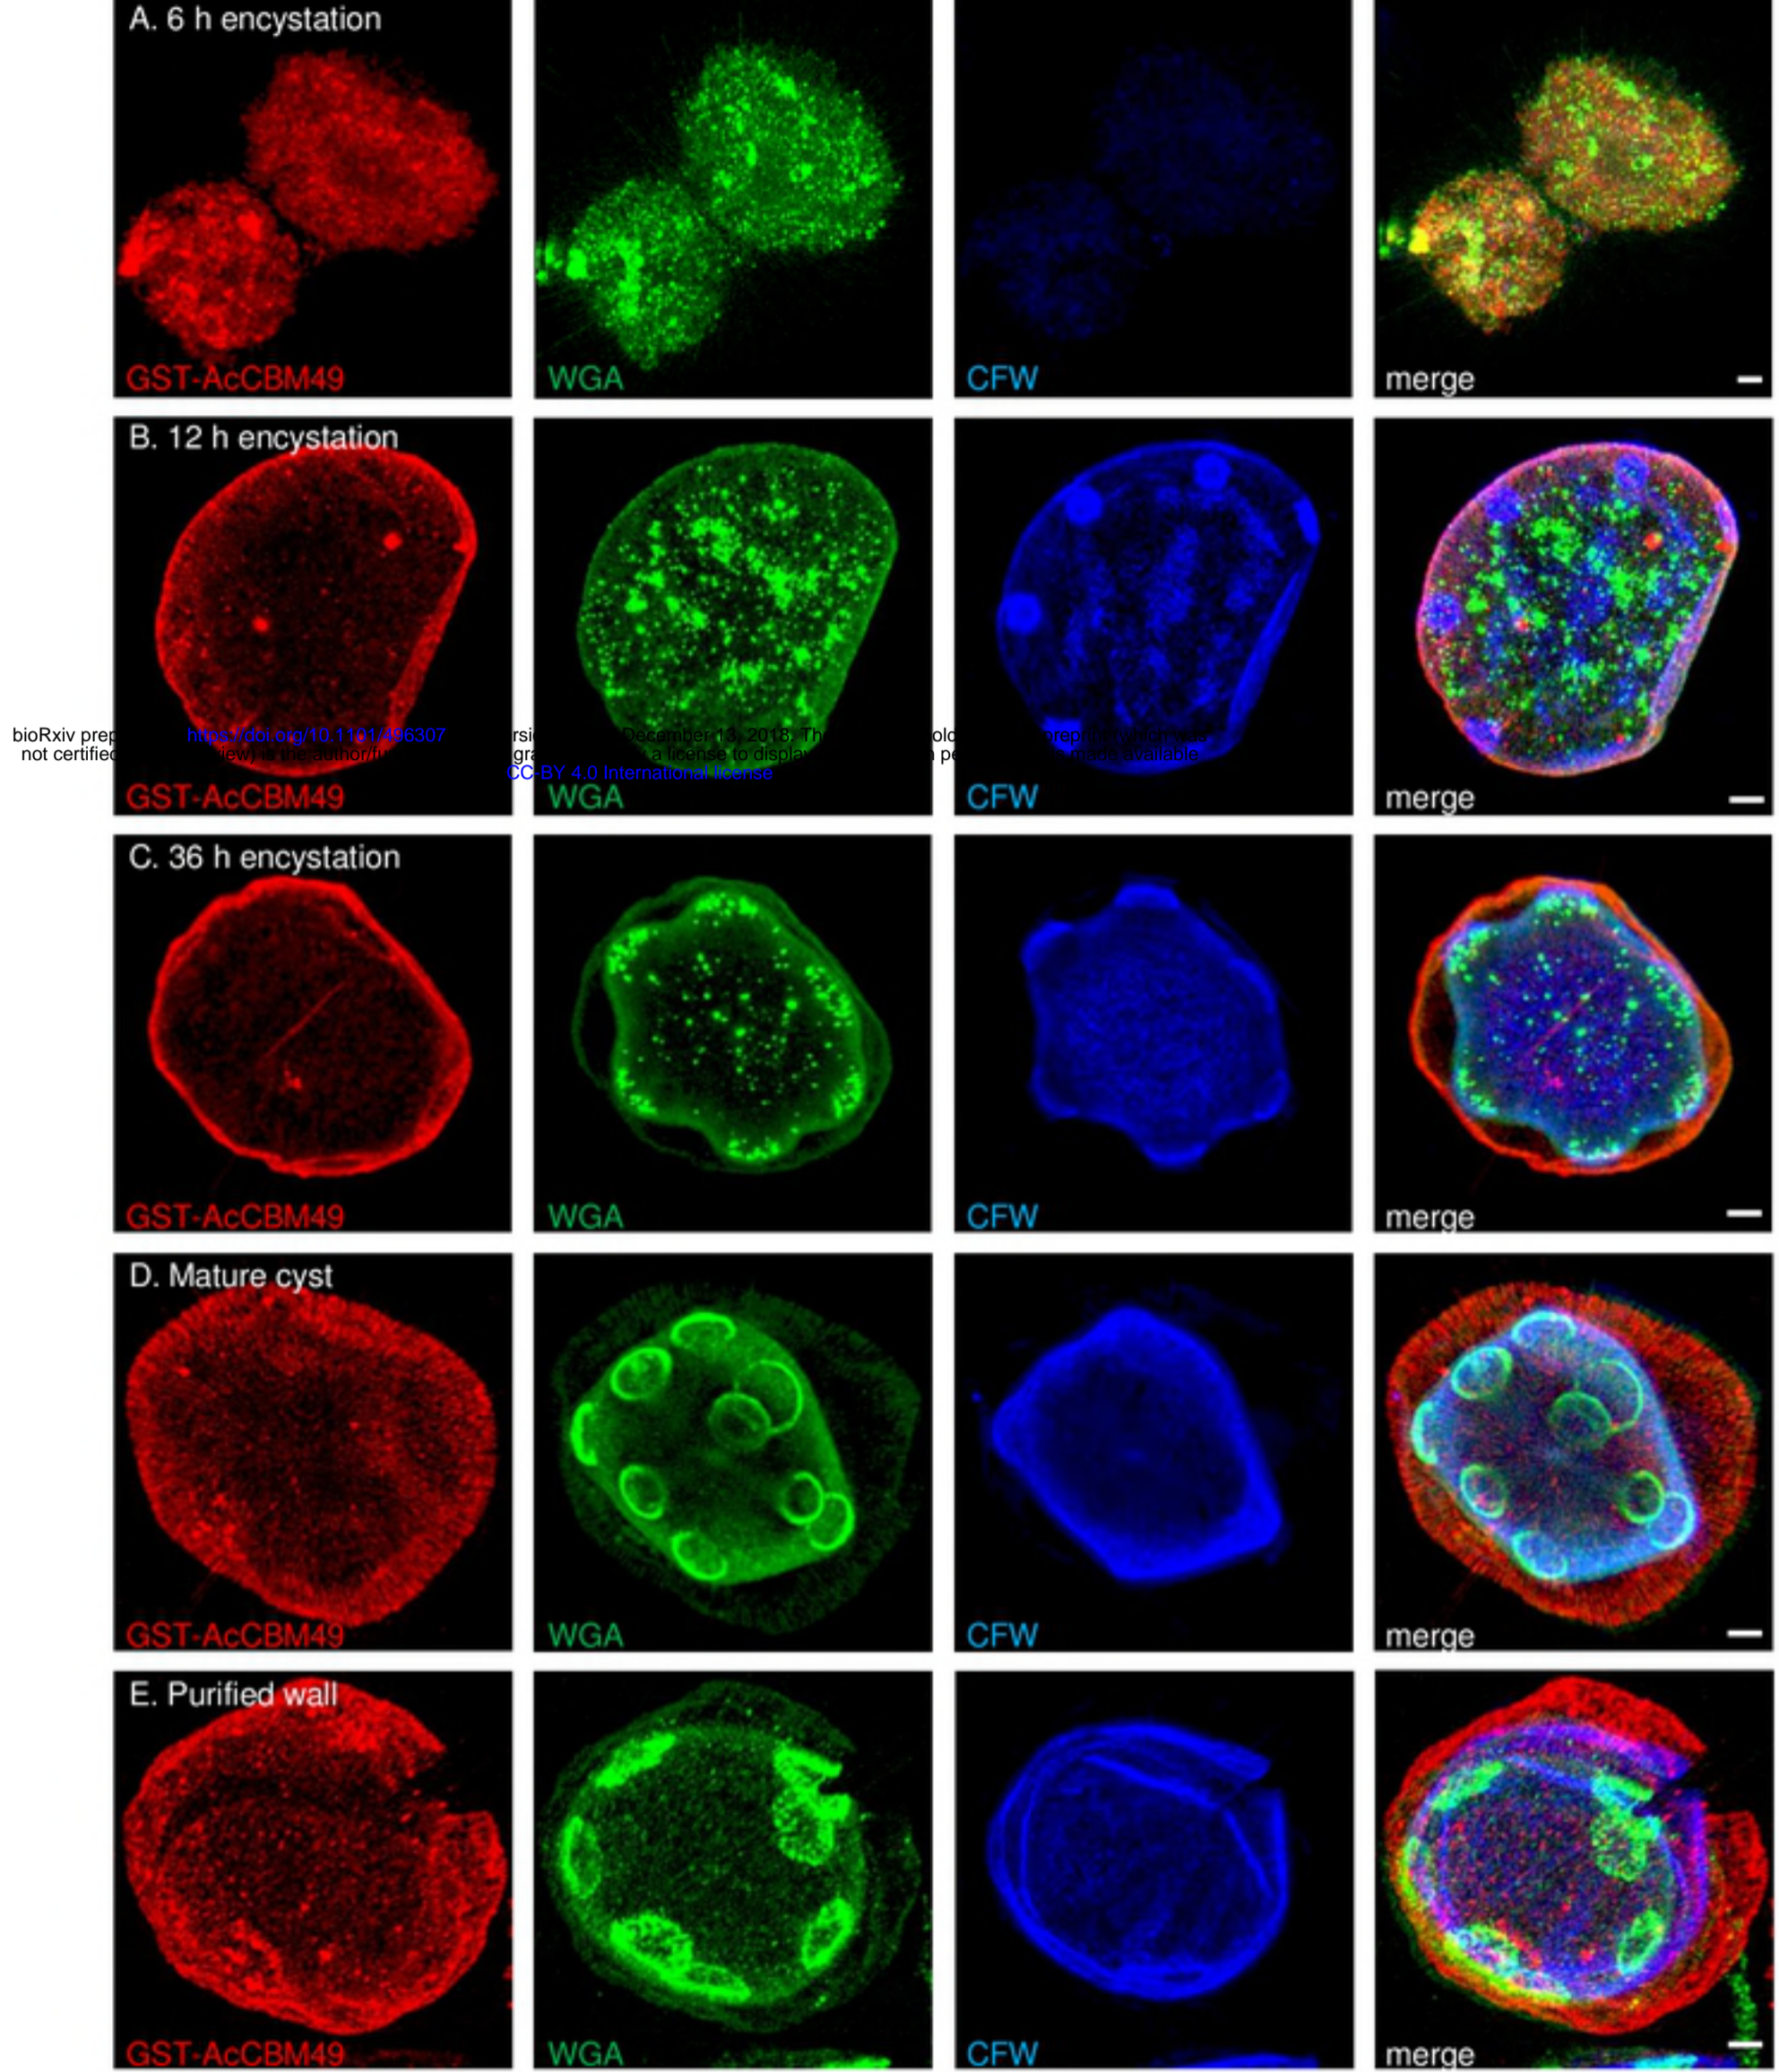

Fig 1
